# Supplementary material
Source: PubMed Central journal article supplement (PMC2728932)

## SUPPLEMENTARY INFORMATION

### Common variants in the *NLRP3* region contribute to Crohn's disease susceptibility

Alexandra-Chloé Villani<sup>1,2</sup>, Mathieu Lemire<sup>3</sup>, Geneviève Fortin<sup>1</sup>, Edouard Louis<sup>4</sup>, Mark S Silverberg<sup>5</sup>, Catherine Collette<sup>1</sup>, Nobuyasu Baba<sup>6</sup>, Cécile Libiouille<sup>4</sup>, Jacques Belaiche<sup>4</sup>, Alain Bitton<sup>7</sup>, Daniel Gaudet<sup>8</sup>, Albert Cohen<sup>9</sup>, Diane Langelier<sup>10</sup>, Paul R Fortin<sup>11</sup>, Joan E Wither<sup>11</sup>, Marika Sarfati<sup>6</sup>, Paul Rutgeerts<sup>12</sup>, John D Rioux<sup>13</sup>, Severine Vermeire<sup>12</sup>, Thomas J Hudson<sup>3</sup> & Denis Franchimont<sup>1,14</sup>

#### Table of Contents:

- 1) Supplementary Methods
- 2) Supplementary Table 1: Primers and probes of the 3 genotyping panels used in the study
- 3) Supplementary Table 2: Primers used for the 9kb sequencing experiment
- 4) Supplementary Table 3: SNPs uncovered while sequencing the 9kb region
- 5) Supplementary Table 4: Association results between *NLRP3* gene expression levels and associated genotypes
- 6) Supplementary Table 5: Association results between IL-1 $\beta$  levels and associated genotypes
- 7) Supplementary Table 6: Linkage disequilibrium between SNPs from Table 1 and SNPs genotyped in the *NLRP3* region in recently published GWAS for CD
- 8) Supplementary Figure 1: Association results between *NLRP3* gene expression levels and associated genotypes
- 9) Supplementary Figure 2: Association results between IL-1 $\beta$  levels and associated genotypes

## SUPPLEMENTARY METHODS

**Subjects.** Five sample sets from four different centres, totaling 710 Crohn's disease trios, 239 Crohn's disease cases, and 107 controls, were assembled for this project (**Table 1**). All patients were recruited through specialized hospitals, academic centres, and practitioners. Inflammatory bowel disease (IBD) specialists involved in this study confirmed the diagnosis of Crohn's disease and patients were excluded from the study in the case of doubtful diagnosis. In all the participating centres, the diagnosis of IBD was made by IBD specialists after fulfilling standard clinical, radiological, endoscopic, and pathological criteria<sup>1</sup> that required (1) one or more of the following symptoms: diarrhea, rectal bleeding, abdominal pain, weight loss, fever or complicated perianal disease; (2) occurrence of symptoms on two or more occasions in the past or ongoing symptoms of at least 4-6 weeks' duration; (3) evidence of inflammation, strictures or fistula from radiological, endoscopic, and histological evaluation (with some specific Crohn's disease characteristics); (4) exclusion of all other diagnoses besides Crohn's disease. Informed consent was obtained from all participants, and protocols were approved by the local Institutional Review Board of all participating Institutions. Only subjects of European ancestry were used in the final analysis.

**SNP selection for the exploratory and follow-up genotyping phases.** We first investigated a 67.8kb region spanning 1q44 (243890897-243958709) (NCBI Build 35, hg17), including *NLRP3* (32.9kb). 43 tagging SNPs were selected using data from HapMap Public Release #22 ( $r^2 \geq 0.8$ ) (minor allele frequency (MAF)  $\geq 0.05$ ) and 14 additional SNPs were selected from dbSNP Build126 in regions with lower coverage. Following the 9kb resequencing experiment, 13 SNPs located within *OR2B11* coding, conserved or predicted regulatory regions were prioritized (**Supplementary Table 3**). For the 58 SNPs not previously genotyped, we used a pairwise tagging approach<sup>2</sup> ( $r^2 \geq$

0.8) to select tagging SNPs that best captured the variation in the region (**Supplementary Table 3**). A total of 24 SNPs were genotyped in the Leuven exploratory Crohn's disease trios, and 15 of them were analysed after excluding 4 rare SNPs (MAF<0.05), 2 with a low success rate (<95%), and 3 not in Hardy-Weinberg equilibrium ( $p<0.01$ ).

**Tissue collection.** Animal: Male BALB/c mice (6-8 weeks) from Charles River Laboratory (St-Constant, Quebec, Canada) were maintained under conventional housing conditions. Acute colitis was induced by rectal instillation of 2.5mg of trinitrobenzene sulfonate (TNBS) (Sigma Aldrich Canada Ltd., Ontario, Canada) and mice were sacrificed on day 2 or day 4 (ref. 3). Chronic colitis was induced by a secondary instillation of TNBS on day 7 and mice were sacrificed 4 days later. All mice were handled according to institutionally recommended animal care guidelines and all experiments were approved by the Animal Studies Ethics Committee of McGill University. Human: Colonic or ileal biopsy specimens were obtained from Crohn's disease patients and from patients undergoing colorectal cancer screening (i.e. healthy controls). All participants gave informed consent and the study was approved by the Institutional Review Board.

**Monocyte isolation and culture.** Peripheral blood cells (PBCs) were isolated by density gradient centrifugation from healthy volunteers' whole blood. Collected cells were further purified by cold aggregation and rosetting with sheep's red blood cells. Monocyte-enriched PBCs were plated at a concentration of  $3 \times 10^6$  cells/ml in serum-free RPMI 1640 (Invitrogen, Ontario, Canada), and non-adherent cells were removed after 1 hour of incubation at 37°C. Adherent cells were cultured for 3 hours in the presence or absence of lipopolysaccharide (LPS) (E.Coli, Sigma-Aldrich, 1µg/ml) in RPMI 1640 +10% fetal bovin serum (FBS) (Invitrogen). Upon harvest, culture supernatants were

collected for cytokine assessment, and monocytes were lysed in RLT buffer (Qiagen RNeasy Mini Kit).

## REFERENCES

1. Lennard-Jones, J.E. Classification of inflammatory bowel disease. *Scan. J. Gastroenterol. Suppl.* **170**, 2-6 (1989).
2. de Bakker, P.I. *et al.* Efficiency and power in genetic association studies. *Nat. Genet.* **37**, 1217-1223 (2005).
3. Neurath, M.F., Fuss, I., Kelsall, B.L., Stüber, E. & Strober, W. Antibodies to interleukin 12 abrogate established experimental colitis in mice. *J. Exp. Med.* **182**, 1281-1290 (1995).

**Supplementary Table 1:** Primers and probes of the 3 genotyping panels used in the study

| <b>ID</b>        | <b>Sequence</b>                               | <b>Panel ID</b>             |
|------------------|-----------------------------------------------|-----------------------------|
| rs4925671-F      | AGAGGGAGAGTAACTGCACCA                         | SNPstream exploratory panel |
| rs4925671-R      | ATTTTAATTCATGAGCTACAATTCATG                   | SNPstream exploratory panel |
| rs4925671-GA-U1  | CAGCACTATTACCATCACGTGGTGCTGCTATTCACAGTGGTTCCC | SNPstream exploratory panel |
| rs10157379-F     | AGAGTCCTTGGCAATGGC                            | SNPstream exploratory panel |
| rs10157379-R     | TTAATTGGGAAGATAGAAACCAGT                      | SNPstream exploratory panel |
| rs10157379-GA-U2 | CTCAGACTACGAATCCACGTGTTTTTTAAGCTCTTTGGTGTCTAC | SNPstream exploratory panel |
| rs12133212-F     | TTAAACATTTTGTCTTTGCTCT                        | SNPstream exploratory panel |
| rs12133212-GA-R  | ATCACAATAAAAGCAGCACAAA                        | SNPstream exploratory panel |
| rs12133212-GA-U3 | CAGCCATCCATTCATCTATGTTCTCCACCACACTGAATGACG    | SNPstream exploratory panel |
| rs9988572-F      | AACTGGTGGGTGCTCATTC                           | SNPstream exploratory panel |
| rs9988572-R      | TACAAAGGGGTTTGAGGACA                          | SNPstream exploratory panel |
| rs9988572-GA-U4  | ATCTAACGCACCTACGACCTTACTTCCCTTCTCCTCTCAATGCTA | SNPstream exploratory panel |
| rs10925019-F     | CCAACTTCAAGCAAATGGAC                          | SNPstream exploratory panel |
| rs10925019-R     | TAGTGCCATGGAGACTGGTT                          | SNPstream exploratory panel |
| rs10925019-GA-U5 | CAACAAGTAATCCGCAGACTTTTGGGCATGAAGTTGGAGAAATAA | SNPstream exploratory panel |
| rs10925027-F     | CTCCACGATTTTCAATCTCC                          | SNPstream exploratory panel |
| rs10925027-R     | TGGCAAATGATTCCATTGTA                          | SNPstream exploratory panel |
| rs10925027-GA-U6 | ACAACTCACGCAAGTACCATTTTTCAATCTCCTATCCTATCAAAG | SNPstream exploratory panel |
| rs10733113-F     | CAGAACAATGAGTGGCACAG                          | SNPstream exploratory panel |
| rs10733113-R     | ACTACTTCTTGCGGCCTGTC                          | SNPstream exploratory panel |
| rs10733113-GA-U7 | TACAAGCACGCACTAGACATGCTTTTTGTTGTTGTTGTTGTTGAT | SNPstream exploratory panel |
| rs6698597-F      | CAAACACTCTGACGGTGATG                          | SNPstream exploratory panel |
| rs6698597-R      | TGTGTCTTTGCTCTCCTTCC                          | SNPstream exploratory panel |
| rs6698597-GA-U8  | AGACTTCTACGCAAGCACTGTTCTCACATACTTAATGTCTCTATC | SNPstream exploratory panel |
| rs10733112-F     | TCTCCACAAATTTTACACGACTT                       | SNPstream exploratory panel |
| rs10733112-R     | AGGATCCACAATGTTTTCCA                          | SNPstream exploratory panel |
| rs10733112-GA-U9 | CCGCCAGTAAGACCTAGACGCCACAAATTTTACACGACTTTTTCA | SNPstream exploratory panel |

|                   |                                                |                             |
|-------------------|------------------------------------------------|-----------------------------|
| rs2027432_F       | ATGGAGACTCAGGTCTGCTG                           | SNPstream exploratory panel |
| rs2027432_R       | CGTGAGGCCTTTAAAACAGA                           | SNPstream exploratory panel |
| rs2027432_GA-U10  | TCCAGAATAGACAACAGACGCTCTGCAGTTCTGTAGAAAGGTGGT  | SNPstream exploratory panel |
| rs10737805-F      | TTTCTTTTTATCTGAGTTTGTCGC                       | SNPstream exploratory panel |
| rs10737805-R      | TTCTCTGTGAGATGAAAGAATTTACA                     | SNPstream exploratory panel |
| rs10737805-GA-U11 | AGCAAGACCACCTAGACCAGCATCATTTCATCTCCTTTGCATCAG  | SNPstream exploratory panel |
| rs10802510-F      | TGATATTACCCATTTCTTTGCAT                        | SNPstream exploratory panel |
| rs10802510-R      | TGCTAATTGAATCATTCCACA                          | SNPstream exploratory panel |
| rs10802510-GA-U12 | CCAGATCCTCACCATGTAAGACTACATATTTATGAATTACAATGC  | SNPstream exploratory panel |
| rs10754561-F      | ATTTAATCACATGAATTGTAGCTCAT                     | SNPstream exploratory panel |
| rs10754561-R      | TTCTCAGTTGTTTGGCTTAA                           | SNPstream exploratory panel |
| rs10754561-GA-U13 | CAACAATACGAGCCAGCAAGCTACAAGAATTCTATTTGGCCATAA  | SNPstream exploratory panel |
| rs4925650_F       | GGAGAATTGCTTGAACATGG                           | SNPstream exploratory panel |
| rs4925650_R       | TTTGCCTCCACCTTCTCATA                           | SNPstream exploratory panel |
| rs4925650-GA-U14  | AACATACAGACGCACTCCTCGGTTTTTYCTCTTTTCCCCTCTCAC  | SNPstream exploratory panel |
| rs947181-F        | GGTGGGGTTAGGTTTTAGGT                           | SNPstream exploratory panel |
| rs947181-R        | CAGCCATAAAAGACCTCTG                            | SNPstream exploratory panel |
| rs947181-GA-U15   | ACAATCAACATACGAACAGCTTACTCAGGTGGCTGAAGTGGGTGC  | SNPstream exploratory panel |
| rs3806265-F       | GGAGCATTTCTGCACTCCTA                           | SNPstream exploratory panel |
| rs3806265-R       | TGTTTGCTGATTGATTTCCA                           | SNPstream exploratory panel |
| rs3806265-GA-U16  | ATACCTACCACGCTACAGCCTTTCTGCACTCCTAGTTTCAAACA   | SNPstream exploratory panel |
| rs12089794-F      | TCCAGCTTGGGTTTCATC                             | SNPstream exploratory panel |
| rs12089794-R      | CAAGATCATGCCACAGCA                             | SNPstream exploratory panel |
| rs12089794-GA-U17 | GCAGACAACGAACAACACTACCAAAAATTCATCTAGTTCCACCTCA | SNPstream exploratory panel |
| rs10925039-F      | GGATGCAGAGGATGGAGTAA                           | SNPstream exploratory panel |
| rs10925039-R      | ACAGGCCGCAAGAAGTAGT                            | SNPstream exploratory panel |
| rs10925039-GA-U18 | AACATCCACGCAACTCATACTGGGGTAAAATGTACGTTATTCGG   | SNPstream exploratory panel |
| rs4925654-F       | TAAGGATAGGGACAGAAAGGAAG                        | SNPstream exploratory panel |
| rs4925654-R       | AACAAAACTATACTTTATCCCTGTCA                     | SNPstream exploratory panel |
| rs4925654-GA-U19  | CCACTCAACTCCACGAATACTAACAGGCTCCAGGACCTATGAACT  | SNPstream exploratory panel |

|                   |                                                 |                             |
|-------------------|-------------------------------------------------|-----------------------------|
| rs955328-F        | AGGGACATTTGAGAGCAGTC                            | SNPstream exploratory panel |
| rs955328-R        | CGTACAGTGTGTGTCCCTTG                            | SNPstream exploratory panel |
| rs955328-GA-U20   | ACAACACTACCGACGACAAGACAACCCTGAGGACATTTGCTGAGTGC | SNPstream exploratory panel |
| rs12745508-F      | TTAATTCTGGCTGAGTTCCCT                           | SNPstream exploratory panel |
| rs12745508-R      | ATTGTGGTGGGATCACAGC                             | SNPstream exploratory panel |
| rs12745508-GA-U21 | GATCCATCAACAGACATCACTCCTCATTCACTCTAGTTCAGCACC   | SNPstream exploratory panel |
| rs4266924-F       | GGGAGAAAAGGGAGAAGTTG                            | SNPstream exploratory panel |
| rs4266924-R       | TGCTGCCGTGTAACCTAAGGT                           | SNPstream exploratory panel |
| rs4266924-GA-U22  | GCAACATAAGACCGCTCAACGCCTTAATATCTCAGCAAGGTCCAT   | SNPstream exploratory panel |
| rs12564791-F      | AACATTCATTCAAGTGCCTGC                           | SNPstream exploratory panel |
| rs12564791-R      | TAGACCATCAGCTCCCCG                              | SNPstream exploratory panel |
| rs12564791-GA-U23 | AGTAGCCTAACAGCACTCGAATGTCTGTCCAGGCGTGGCAAAGAT   | SNPstream exploratory panel |
| rs3806268-F       | ATGATGAGCATTCTGAGCCT                            | SNPstream exploratory panel |
| rs3806268-R       | ATATAGAACAGATAGTCAAACCTGTCTTG                   | SNPstream exploratory panel |
| rs3806268-GA-U24  | CAACAAGACATAACAACGCACCAGGAAGATGATGTTGGACTGGGC   | SNPstream exploratory panel |
| rs10754557-F      | AAATCAGAAGTGTACATAGAGCTTGT                      | SNPstream exploratory panel |
| rs10754557-R      | CAACCTTCCATAGAGATGGC                            | SNPstream exploratory panel |
| rs10754557-GA-U25 | CCATAACAACCTACCAGCCAGCTTCCTTGTCCATGGTGGAGCGTG   | SNPstream exploratory panel |
| rs7525979-F       | ACATCATCTTCCTGGCCA                              | SNPstream exploratory panel |
| rs7525979-R       | ATTAAGATGGAGTTGCTGTTTGA                         | SNPstream exploratory panel |
| rs7525979-GA-U26  | AGACCGACAAGCAATCTACATCCCTGCCGCCCCCTGGAACACCAC   | SNPstream exploratory panel |
| rs4317844-F       | AGAACCTGGGGGTACAAAAG                            | SNPstream exploratory panel |
| rs4317844-R       | CAGTTCCAGACTCTCGCTGT                            | SNPstream exploratory panel |
| rs4317844-GA-U27  | GCAAGCCATCAGCTAATACAGGGGTACAAAAGGCATCGTGAACCT   | SNPstream exploratory panel |
| rs12565738-F      | GAGCAACTTGGAGGAAGTGA                            | SNPstream exploratory panel |
| rs12565738-R      | AATTCTGTGTCTCCGTGCTT                            | SNPstream exploratory panel |
| rs12565738-GA-U28 | CACTACATACGACCGCAGAAAGAATCAGGTTTCGGGTAGAAGAGA   | SNPstream exploratory panel |
| rs10159239-F      | GAGGAAAGCTGTGTGAGGAG                            | SNPstream exploratory panel |
| rs10159239-R      | TGTCACAGGAGACACAAATGAT                          | SNPstream exploratory panel |
| rs10159239-GA-U29 | AATAAGCTCACACCGTCAATCAGTTTGCCTTGGCTCTTTCTGTC    | SNPstream exploratory panel |

|                   |                                               |                             |
|-------------------|-----------------------------------------------|-----------------------------|
| rs10732301-F      | ATTTTACACTTGCTGCTTAATACGT                     | SNPstream exploratory panel |
| rs10732301-R      | GCAGGATGGGCAGTATTAAC                          | SNPstream exploratory panel |
| rs10732301-GA-U30 | CAGTCAACAATCCAGATCAACATCGACCCATCCATCCTCCACCTC | SNPstream exploratory panel |
| rs12070953-F      | TTTATTTCTCTTCTATTCCATAATCAC                   | SNPstream exploratory panel |
| rs12070953-R      | TACATCTCATGTCCTCATCATCC                       | SNPstream exploratory panel |
| rs12070953-GA-U31 | CAGAACATCCTCAGAAGCAATTCACTACACCCTGAGAAATAAAG  | SNPstream exploratory panel |
| rs12086048-F      | TGCTCAGGATCCAGTCCTC                           | SNPstream exploratory panel |
| rs12086048-R      | ATGTAAATCGCAGGTAGGTAGAAG                      | SNPstream exploratory panel |
| rs12086048-GA-U32 | CAAGCAACGACCTACTACAAAGGGACGACACAAGGCCTTTGGGAC | SNPstream exploratory panel |
| rs12048215-F      | AGGGTATTGCAGGATGATGA                          | SNPstream exploratory panel |
| rs12048215-R      | CTGCACACTGCTGTCTGTTT                          | SNPstream exploratory panel |
| rs12048215-GA-U33 | CGCAGAAGCAACTCACTTCTAAGGCAGGGCAGCAGTGTGGGTGTA | SNPstream exploratory panel |
| rs10399895-F      | AAGTAGAAGGGTGGGGAGGT                          | SNPstream exploratory panel |
| rs10399895-R      | GGCACATCCTGAATCAGTTC                          | SNPstream exploratory panel |
| rs10399895-GA-U34 | CACTAGTCATAACGCAGCCTAAGGGTGGGGAGGTGGAGGTTGAAG | SNPstream exploratory panel |
| rs4925663-F       | CCTTCTTCGTGTTGGTGC                            | SNPstream exploratory panel |
| rs4925663-R       | TCCCTTGGAGGACTGGAT                            | SNPstream exploratory panel |
| rs4925663-GA-U35  | CAGAATAGCCACGCCTAGATCTGGCTCTCATCCTTCTCTCCTATG | SNPstream exploratory panel |
| rs1106719-F       | GCAGCTACAGTCAGTGGACAT                         | SNPstream exploratory panel |
| rs1106719-R       | ACACCAAGCAGAGCAAGTCT                          | SNPstream exploratory panel |
| rs1106719-GA-U36  | CACCGCTATCAACAGACTTGTTCCAGGCATTCTAGAATGAGAAAA | SNPstream exploratory panel |
| rs10925022-F      | GATGCTTCCTCTGTTCTGGA                          | SNPstream exploratory panel |
| rs10925022-R      | CTGGTTGCTGCTGAGGAC                            | SNPstream exploratory panel |
| rs10925022-GA-U37 | ACCGCACTAAGCAATGTATCCTCTGTTCTGGAGCTCTCTGGTCAG | SNPstream exploratory panel |
| rs3738447-F       | GCTTCCAGGTGCTTCCTC                            | SNPstream exploratory panel |
| rs3738447-R       | ATACATCAATCTTTGCTCATGAAG                      | SNPstream exploratory panel |
| rs3738447-GA-U38  | ACGTAAGACCACTCAAGACCGCTTCCTCGCCAGCTTCTTCTTGGC | SNPstream exploratory panel |
| rs12137901-F      | AATAGAAGGAGAAGGCCAGG                          | SNPstream exploratory panel |
| rs12137901-R      | TTCATCTCACTTCAATCCACTG                        | SNPstream exploratory panel |
| rs12137901-GA-U39 | CACGACAAGACAACAGATACGGTGAGTAAGTGTGTTGATAACAGA | SNPstream exploratory panel |



|                   |                                                |                             |
|-------------------|------------------------------------------------|-----------------------------|
| rs6673762_F       | TGGCACTTTGTTACAGCAGA                           | SNPstream exploratory panel |
| rs6673762_R       | TCATCATGTTGTCCAGGCTA                           | SNPstream exploratory panel |
| rs6673762-GA-U40  | AAGTACCACGTCAACGTCACAGCATTGTTGGGAGGCCGAGGCGGGC | SNPstream exploratory panel |
| rs10925014-F      | GGCATGGATTTTTACTGCAT                           | SNPstream exploratory panel |
| rs10925014-R      | AGCTCATTGGCTGAACCTG                            | SNPstream exploratory panel |
| rs10925014-GA-U41 | TACCTATGACCAGCAAGCACACTCCTGGGCTCAAGCTATCCTCCC  | SNPstream exploratory panel |
| rs6677787-F       | AGAAGGCAGACCATGTGG                             | SNPstream exploratory panel |
| rs6677787-R       | ATCTCTTTTTGCTTTCTCATAAAGG                      | SNPstream exploratory panel |
| rs6677787-GA-U42  | CTCACTATCTGACAAGCCACTGGGGAGGAGAAGGCGTGGGCCATG  | SNPstream exploratory panel |
| rs12239046-F      | AGTCGTGAAATCCCCAGAC                            | SNPstream exploratory panel |
| rs12239046-R      | TCCTCTTTGGAAGCCTTCTT                           | SNPstream exploratory panel |
| rs12239046-GA-U44 | CAAGACCGCAACTAGATACAGGGAGGGGGAAGCTATAACATTAGC  | SNPstream exploratory panel |
| rs4378247-F       | GAGCACCTCCAATGACAGAG                           | SNPstream exploratory panel |
| rs4378247-R       | GAACCACATTGGGCACTTAG                           | SNPstream exploratory panel |
| rs4378247-GA-U43  | AGCCGAACTACCACTGAGTACACGGCTCCCAATAAAAATGTGGGG  | SNPstream exploratory panel |
| rs4925546-F       | GTATCACCAAATAAGGTCACAATCT                      | SNPstream exploratory panel |
| rs4925546-R       | TTTATATTATGGTTCTAGTTTCAATAGATAGG               | SNPstream exploratory panel |
| rs4925546-GA-U45  | CTAACTAAGCTACGCCGACACTAGGACTTCCACATATAAAGTCTT  | SNPstream exploratory panel |
| rs12128790_F      | CCTGATAAGGGGTAAACACTCA                         | SNPstream exploratory panel |
| rs12128790_R      | TTTGCATTTCCCTGATGACT                           | SNPstream exploratory panel |
| rs12128790-GA-U46 | ACAGATCACTACCGACTAAACTCTTACAACCTCAAACTAAGAGA   | SNPstream exploratory panel |
| rs6700719-F       | AAGCTATACAGTGGTGAAATCCTAGT                     | SNPstream exploratory panel |
| rs6700719-R       | ATTTCAACAGAATCAGATAACTGGA                      | SNPstream exploratory panel |
| rs6700719-GA-U47  | ACAAGAACTCCATGACTCAACATGGCAGTGATTTTCAGTGTGAAAC | SNPstream exploratory panel |
| rs4356092-F       | AAATGTTTTTCATTTGTTCCACAT                       | SNPstream exploratory panel |
| rs4356092-R       | AGTTTTTTCAGCCTTAAGAAATTATG                     | SNPstream exploratory panel |
| rs4356092-GA-U48  | CGATCACCTCACTAGAACAAGAACTTTTAATCTCACCCAGGGGA   | SNPstream exploratory panel |
| rs10157379_F      | ACGTTGGATGTGCTGGTCATCTGTTTCATGC                | Sequenom exploratory panel  |
| rs10157379_R      | ACGTTGGATGTGCCAGAGTCCTTGGCAATG                 | Sequenom exploratory panel  |
| rs10157379_F_CT   | GTATTTCTATTTTTCCCTGCCT                         | Sequenom exploratory panel  |

|                 |                                        |                            |
|-----------------|----------------------------------------|----------------------------|
| rs10399895_F    | ACGTTGGATGTACAAGTGCAGGTTTCTGAAAAG      | Sequenom exploratory panel |
| rs10399895_R    | ACGTTGGATGACGCAGAGTGGAGGAATAGATA       | Sequenom exploratory panel |
| rs10399895_F_CT | TCGTACCCAACAGGTAAT                     | Sequenom exploratory panel |
| rs10732301_F    | ACGTTGGATGCTTAATACGTGGCCATTGCT         | Sequenom exploratory panel |
| rs10732301_R    | ACGTTGGATGAACCCTGGAGGTGAGTGATT         | Sequenom exploratory panel |
| rs10732301_F_AG | ATCCATCCTCCACCTC                       | Sequenom exploratory panel |
| rs10737805_F    | ACGTTGGATGTGTGATCTTCATTTCTGGAGACT      | Sequenom exploratory panel |
| rs10737805_R    | ACGTTGGATGTTGTCTATCACATGTAAGGGTCTG     | Sequenom exploratory panel |
| rs10737805_R_CT | GGGTTGGACGACACAGGCAA                   | Sequenom exploratory panel |
| rs10754555_F    | ACGTTGGATGGAAACAGACAGCAGTGTGCA         | Sequenom exploratory panel |
| rs10754555_R    | ACGTTGGATGTAAGTACTGACACAATGATAATTGC    | Sequenom exploratory panel |
| rs10754555_F_CG | GATGGGAGGTCAGAAACCA                    | Sequenom exploratory panel |
| rs10754558_F    | ACGTTGGATGAGCTTGGGCATCTCCTTTAC         | Sequenom exploratory panel |
| rs10754558_R    | ACGTTGGATGGAACATCCTCTAACTGAGGC         | Sequenom exploratory panel |
| rs10754558_F_CG | ACAATGACAGCATCGGGTGTTGTT               | Sequenom exploratory panel |
| rs10802496_F    | ACGTTGGATGAGTCAAGCCATGTATGCCTCA        | Sequenom exploratory panel |
| rs10802496_R    | ACGTTGGATGGGTTTCACCATATTGGTCAGG        | Sequenom exploratory panel |
| rs10802496_F_AT | TACTATTGGCTGGGCG                       | Sequenom exploratory panel |
| rs10802510_F    | ACGTTGGATGATTTGAGGTGATGGATATGCT        | Sequenom exploratory panel |
| rs10802510_R    | ACGTTGGATGTAAATACTGTAACATTTTTAAAGTTCCA | Sequenom exploratory panel |
| rs10802510_F_CT | ACAATGTATACACATATATCAAAATAT            | Sequenom exploratory panel |
| rs10925014_F    | ACGTTGGATGATAAAGGCATGGATTTTTACTGC      | Sequenom exploratory panel |
| rs10925014_R    | ACGTTGGATGCTGTAATCCCAGCTCTCAGG         | Sequenom exploratory panel |
| rs10925014_R_CT | AAAATCAGGGAGGCAAGAGG                   | Sequenom exploratory panel |
| rs10925019_F    | ACGTTGGATGCCATGGAGACTGGTTGTTTG         | Sequenom exploratory panel |
| rs10925019_R    | ACGTTGGATGGCCTCTCCAGAATCATACAG         | Sequenom exploratory panel |
| rs10925019_F_CT | TGGTTGTTTGGGACATTTAAC                  | Sequenom exploratory panel |
| rs10925026_F    | ACGTTGGATGGATCACAACCTCAAGATGGG         | Sequenom exploratory panel |
| rs10925026_R    | ACGTTGGATGTCCATCTAAGAAGCTCCTAC         | Sequenom exploratory panel |
| rs10925026_R_GT | CCTCAAGATGGGAATGTTA                    | Sequenom exploratory panel |

|                 |                                 |                            |
|-----------------|---------------------------------|----------------------------|
| rs10925039_F    | ACGTTGGATGCGCAAGAAGTAGTGACATT   | Sequenom exploratory panel |
| rs10925039_R    | ACGTTGGATGAGGGAGGAGAAATTACGTGG  | Sequenom exploratory panel |
| rs10925039_F_CT | TGGGCATTTAGCGTAACTATCA          | Sequenom exploratory panel |
| rs12048215_F    | ACGTTGGATGGGGAAGGAGGAGTACAAATG  | Sequenom exploratory panel |
| rs12048215_R    | ACGTTGGATGTGGTTTCTGACCTCCCCCG   | Sequenom exploratory panel |
| rs12048215_F_AG | GCAGCAGTGTGGGTGTA               | Sequenom exploratory panel |
| rs12062001_F    | ACGTTGGATGGTGACAGAGCGAGATTCCAT  | Sequenom exploratory panel |
| rs12062001_R    | ACGTTGGATGACAGAGCAGGGAATGAAACA  | Sequenom exploratory panel |
| rs12062001_R_AT | GAGAAAGCAAGCACATTT              | Sequenom exploratory panel |
| rs12070953_F    | ACGTTGGATGCATGTCCTCATCATCCACAG  | Sequenom exploratory panel |
| rs12070953_R    | ACGTTGGATGAATCACCCCCACTCTCAATC  | Sequenom exploratory panel |
| rs12070953_F_CT | CAGAGCCCCCTTCATA                | Sequenom exploratory panel |
| rs12089794_F    | ACGTTGGATGATTCCAGCTTGGGTTTCATC  | Sequenom exploratory panel |
| rs12089794_R    | ACGTTGGATGAAGATCATGCCACAGCACTC  | Sequenom exploratory panel |
| rs12089794_F_AG | TCATCTAGTTCCACCTCA              | Sequenom exploratory panel |
| rs1539019_F     | ACGTTGGATGCTACCTTCTCTCTGAGTGTC  | Sequenom exploratory panel |
| rs1539019_R     | ACGTTGGATGGCTATAGGGTAGGGTATCTG  | Sequenom exploratory panel |
| rs1539019_F_GT  | TCTCTGAGTGTCCTTGGACAAAG         | Sequenom exploratory panel |
| rs2027432_F     | ACGTTGGATGACCAAGCACTACATCAACCC  | Sequenom exploratory panel |
| rs2027432_R     | ACGTTGGATGGAGCATTCTCTCTGCAGTTC  | Sequenom exploratory panel |
| rs2027432_F_CT  | AGTTGGTTCCGATGAC                | Sequenom exploratory panel |
| rs4353135_F     | ACGTTGGATGGAGAGAATGAAGGAAGCAAG  | Sequenom exploratory panel |
| rs4353135_R     | ACGTTGGATGTATTACAGTACCTGGCTCAC  | Sequenom exploratory panel |
| rs4353135_F_GT  | AAGATAGAGGGGTAAATGTAT           | Sequenom exploratory panel |
| rs4356092_F     | ACGTTGGATGGTCTGGATACACAGCAAATG  | Sequenom exploratory panel |
| rs4356092_R     | ACGTTGGATGGCCTTAAGAAATTATGTTTCC | Sequenom exploratory panel |
| rs4356092_F_AG  | TTAATCTCACCCAGGGGA              | Sequenom exploratory panel |
| rs4925546_F     | ACGTTGGATGCAATAGATAGGGTGTTATGG  | Sequenom exploratory panel |
| rs4925546_R     | ACGTTGGATGCCTGTGAAAGAACAAGTC    | Sequenom exploratory panel |
| rs4925546_R_CT  | ATGGATTGAATTGTTTCCTC            | Sequenom exploratory panel |

|                       |                                  |                            |
|-----------------------|----------------------------------|----------------------------|
| rs4925671_F           | ACGTTGGATGCATGAGCTACAATTCATGTG   | Sequenom exploratory panel |
| rs4925671_R           | ACGTTGGATGGAGTCAAACCTAGAGAGGG    | Sequenom exploratory panel |
| rs4925671_F_CT        | CATCATGTGATTAATGCTGCTA           | Sequenom exploratory panel |
| rs6673459_F           | ACGTTGGATGCCCAAGTCTTGGCAATTGA    | Sequenom exploratory panel |
| rs6673459_R           | ACGTTGGATGCTTTGCTCTCCTCCTACTC    | Sequenom exploratory panel |
| rs6673459_R_CA        | TCAGGAATATTAATGGTTTAGTTG         | Sequenom exploratory panel |
| rs6673762_F           | ACGTTGGATGTCATCATGTTGTCCAGGCTAGT | Sequenom exploratory panel |
| rs6673762_R           | ACGTTGGATGGTTACAGCAGAAACCACACCA  | Sequenom exploratory panel |
| rs6673762_F_CT        | AGTCCTGACCTCAGGTGATC             | Sequenom exploratory panel |
| rs6700719_F           | ACGTTGGATGCCTCAAGCTATACAGTGGTG   | Sequenom exploratory panel |
| rs6700719_R           | ACGTTGGATGAGAGCCCAGAGTAAAACCAG   | Sequenom exploratory panel |
| rs6700719_F_AG        | GGAAAGTGATTCAGTGTGAAAC           | Sequenom exploratory panel |
| rs7528887_F           | ACGTTGGATGCCTGAAATTTGCTAAGAGAG   | Sequenom exploratory panel |
| rs7528887_R           | ACGTTGGATGCATGAGTTAACATAGCCACC   | Sequenom exploratory panel |
| rs7528887_R_CA        | AAGAGATTTTAGATGTTTTTACCAC        | Sequenom exploratory panel |
| 9kb_ss107635120_GA-F  | ACGTTGGATAGAAAGGGGCAGGGATTAGA    | Sequenom Phase II panel    |
| 9kb_ss107635120_GA-R  | ACGTTGGATCCATTGAGAAACCGTGTGTG    | Sequenom Phase II panel    |
| 9kb_ss107635120_GA-Pa | ACAAGAGAAACCGTGTGTGTGTG          | Sequenom Phase II panel    |
| 9kb_ss107635122_CT-F  | ACGTTGGATGATACCTTGGCTCTTCCACTC   | Sequenom Phase II panel    |
| 9kb_ss107635122_CT-R  | ACGTTGGATGTCATGACCACACACGCACAG   | Sequenom Phase II panel    |
| 9kb_ss107635122_CT-P  | ACACGCACAGGCAGCCCTGTCACTACA      | Sequenom Phase II panel    |
| 9kb_ss107635124_CT-F  | ACGTTGGATGTGGGA ACTACTGTGTCCATC  | Sequenom Phase II panel    |
| 9kb_ss107635124_CT-R  | ACGTTGGATGGCACTCCTTGACCTTCTTC    | Sequenom Phase II panel    |
| 9kb_ss107635124_CT-P  | ATCTTTCATCTTCCC ACTAC            | Sequenom Phase II panel    |
| 9kb_ss107635126_GA-F  | ACGTTGGATTGAATCCCGCAGTTTCTTC     | Sequenom Phase II panel    |
| 9kb_ss107635126_GA-R  | ACGTTGGATGCAAATGTCAGGGATAAGAGGT  | Sequenom Phase II panel    |
| 9kb_ss107635126_GA-Pa | GCGGAATGATATATATCTAAGGGTG        | Sequenom Phase II panel    |
| 9kb_ss107635130_TA-F  | ACGTTGGATGCCTCAACTCCACCTCTTCA    | Sequenom Phase II panel    |
| 9kb_ss107635130_TA-R  | ACGTTGGATCTATTCCCAGCAGGAGGATG    | Sequenom Phase II panel    |
| 9kb_ss107635130_TA-Pa | TCTGGCACAGGATGAGAAAGG            | Sequenom Phase II panel    |

|                         |                                  |                         |
|-------------------------|----------------------------------|-------------------------|
| 9kb_ss107635144_CT-F    | ACGTTGGATGCACAAGTGAGGCACAGATAG   | Sequenom Phase II panel |
| 9kb_ss107635144_CT-R    | ACGTTGGATGAAGCATGAGACCTGAACTGG   | Sequenom Phase II panel |
| 9kb_ss107635144_CT-P    | CTGAACTGGCTTCAACACCAGGCT         | Sequenom Phase II panel |
| rs55646866_CT-F         | ACGTTGGATGAAAAAGGCGATGACGTGTGG   | Sequenom Phase II panel |
| rs55646866_CT-R         | ACGTTGGATGAGTGATGGGCCTATGGGAG    | Sequenom Phase II panel |
| rs55646866_CT-P         | CTATGGGAGGGAGGATA                | Sequenom Phase II panel |
| rs10925032_AG-F         | ACGTTGGATGATTCCTCCATTGAAACCCTG   | Sequenom Phase II panel |
| rs10925032_AG-R         | ACGTTGGATGCATGTTGCAACAGGTGTTCC   | Sequenom Phase II panel |
| rs10925032_AG-P         | TTCCCTGCTGCCCCAGTTGAT            | Sequenom Phase II panel |
| rs10925034_rs10925035-F | ACGTTGGATGGTATCACAGCCTGCGTGTTCC  | Sequenom Phase II panel |
| rs10925034_rs10925035-R | ACGTTGGATGCGCTCAAGAGTTACCTGCTG   | Sequenom Phase II panel |
| rs10925034_AG-P         | CTCAAGAGTTACCTGCTGATTGTATC       | Sequenom Phase II panel |
| rs10925035_GA-Pa        | GGAAACTGCGGGAATTCAG              | Sequenom Phase II panel |
| rs10925040_CT-F         | ACGTTGGATGAAGCCAAACAACACTGAGGAAC | Sequenom Phase II panel |
| rs10925040_CT-R         | ACGTTGGATGCTTACTCCATCCTCTGCATC   | Sequenom Phase II panel |
| rs10925040_CT-P         | ATTTAGCTCCCACTTGTA               | Sequenom Phase II panel |
| rs11583410_CA-F         | ACGTTGGATGATGAGAACGGCATAGTGCAG   | Sequenom Phase II panel |
| rs11583410_CA-R         | ACGTTGGATGATATGCAGTCTTCCACTGGC   | Sequenom Phase II panel |
| rs11583410_CA-Pa        | ATCCCACCCTGGACCGCTACGTGGCCA      | Sequenom Phase II panel |
| rs11802680_GA-F         | ACGTTGGATCATCACCGTCAGAGTGTTGA    | Sequenom Phase II panel |
| rs11802680_GA-R         | ACGTTGGATGCCCTTCTGCTTGCTTTATG    | Sequenom Phase II panel |
| rs11802680_GA-Pa        | CGTTATGCTTGCTTTATGTCAC           | Sequenom Phase II panel |
| rs12028142_rs35305980-F | ACGTTGGATGCTCAATTTGCCACAAGTGCC   | Sequenom Phase II panel |
| rs12028142_rs35305980-R | ACGTTGGATGACACACCCAGAAGGATGAAG   | Sequenom Phase II panel |
| rs12028142_AG-P         | AATTGTGAAGGCTTTAGGGGA            | Sequenom Phase II panel |
| rs35305980_-A-Pa        | GCAACATGAAAAGTGACAACCATAGCT      | Sequenom Phase II panel |
| rs12135709_GC-F         | ACGTTGGATGCAATGTTGCATCGTTGCAGG   | Sequenom Phase II panel |
| rs12135709_GC-R         | ACGTTGGATGCAGGTAGCAAGTTCCAAGAG   | Sequenom Phase II panel |
| rs12135709_GC-Pa        | TCGTTTCTGCCAGGAC                 | Sequenom Phase II panel |
| rs12406394_AT-F         | ACGTTGGATGGCTGCTCGGCAAAGAAATTG   | Sequenom Phase II panel |

|                  |                                 |                         |
|------------------|---------------------------------|-------------------------|
| rs12406394_AT-R  | ACGTTGGATGCTACGGAAAGATCAGACTGC  | Sequenom Phase II panel |
| rs12406394_AT-P  | GCTTGAGTGACATTCCA               | Sequenom Phase II panel |
| rs12756328_GC-F  | ACGTTGGATGTCTCATAATGCTCTCCCTCC  | Sequenom Phase II panel |
| rs12756328_GC-R  | ACGTTGGATGTTCCCTCATGCTGTGAATGAC | Sequenom Phase II panel |
| rs12756328_GC-Pa | ATTATCGGGGGCCCATCAGGGAGTG       | Sequenom Phase II panel |
| rs4269805_CT-F   | ACGTTGGATCCACTCTTCCTTTCCCAGGT   | Sequenom Phase II panel |
| rs4269805_CT-R   | ACGTTGGATGCAAAGACACAGAGGCTGCT   | Sequenom Phase II panel |
| rs4269805_CT-P   | TTCAGAACCAGGAGCCCCAG            | Sequenom Phase II panel |
| rs4301663_AG-F   | ACGTTGGATCCTCCTTCAATTGCCAAGAC   | Sequenom Phase II panel |
| rs4301663_AG-R   | ACGTTGGATTCAAACACTCTGACGGTGATG  | Sequenom Phase II panel |
| rs4301663_AG-P   | GCATTTCTAGAGCGAAGCGTGCT         | Sequenom Phase II panel |
| rs4362022_CT-F   | ACGTTGGATGGAAGGTGTGCAATGCTTGAG  | Sequenom Phase II panel |
| rs4362022_CT-R   | ACGTTGGATGTGCTGTTAGGAAGCAACTGG  | Sequenom Phase II panel |
| rs4362022_CT-P   | CCTTTCGACTGCACCA                | Sequenom Phase II panel |
| rs6665526_CT-F   | ACGTTGGATGTGCGTGTGTGGTCATGACAG  | Sequenom Phase II panel |
| rs6665526_CT-R   | ACGTTGGATGGGCTGTATTGATAGGACCAC  | Sequenom Phase II panel |
| rs6665526_CT-P   | GCTTGCATCCAGCTCCCGGATTCA        | Sequenom Phase II panel |
| rs6672995_AG-F   | ACGTTGGATGAGCCCATCAGAGGAAATGTG  | Sequenom Phase II panel |
| rs6672995_AG-R   | ACGTTGGATGAGTCTGTGTTGGCCTTAGTC  | Sequenom Phase II panel |
| rs6672995_AG-P   | CCGCGGAGGGACATTTAA              | Sequenom Phase II panel |
| rs9988620_CA-F   | ACGTTGGATGCCTCAAACCCCTTTGTA CTG | Sequenom Phase II panel |
| rs9988620_CA-R   | ACGTTGGATGTTTCAGGACAGCCCGGTTTC  | Sequenom Phase II panel |
| rs9988620_CA-P   | ATGCCCTCACTAATTTAACTATTC        | Sequenom Phase II panel |

**Supplementary Table 2: Primers used for the 9kb sequencing experiment**

| <b>ID</b>   | <b>Primer Sequence</b>    |
|-------------|---------------------------|
| 9kb_set1_F  | ATGCACCGTGCTCTCTGTC       |
| 9kb_set1_R  | GAATCAGGAAATTGGAAGTGAAA   |
| 9kb_set2_F  | GCAAAGACACAGAGGCTGCT      |
| 9kb_set 2_R | CGGCACCTCACAGAAAAAGT      |
| 9kb_set3_F  | CTGCTCGGCAAAGAAATTGT      |
| 9kb_set 3_R | TCCCAGGTGATAGCCTGTTT      |
| 9kb_set4_F  | GCCACAGCTCACTGTTTTGA      |
| 9kb_set 4_R | AAGCTCTTGATTGGCGTGAG      |
| 9kb_set5_F  | TCTCCTCCAGATTCTATCAACA    |
| 9kb_set5_R  | CCATTGAGAAACCGTGTGTG      |
| 9kb_set6_F  | AGAAAGGGGCAGGGATTAGA      |
| 9kb_set6_R  | TTCGTGTGAGGGTGAGTGAG      |
| 9kb_set7_F  | CTTGCTACCTGCCTCTCTGC      |
| 9kb_set7_R  | GTGCCAGCTAACGTCTCGAT      |
| 9kb_set8_F  | TTTGCAGTCCTGGTTCAATG      |
| 9kb_set8_R  | GCAAGACCCCATCTCTATTTATTTT |
| 9kb_set9_F  | CCTCTGGATGTCATAATCTGTCAC  |
| 9kb_set9_R  | CCAGCTCCTTCTCCTCCTCT      |
| 9kb_set10_F | AGAGTCCTCAGCCTCGTCAG      |
| 9kb_set10_R | TTCCTGGAATATGAAGAGCATT    |
| 9kb_set11_F | ATCCTGCACCTCCACTGC        |
| 9kb_set11_R | CACACACACACACACAGAGTTCTT  |
| 9kb_set12_F | TGAGGTGGTGTGAGAGCTTG      |
| 9kb_set12_R | TCTGTGCCACTCATTGTTCTG     |
| 9kb_set13_F | TCTGTGCCTCACTTGTGTTTTC    |
| 9kb_set13_R | CATGACTCACCTGTGTCCA       |

**Supplementary Table 3: SNPs uncovered while sequencing the 9kb region**

| #  | SNP ID                     | dbSNP129    | Frequency <sup>e</sup> |
|----|----------------------------|-------------|------------------------|
| 1  | rs4925663 <sup>a</sup>     | 245,681,240 | 0.417                  |
| 2  | rs11583410 <sup>c</sup>    | 245,681,519 | 0.354                  |
| 3  | rs12028142 <sup>c</sup>    | 245,681,875 | 0.25                   |
| 4  | rs35305980 <sup>c</sup>    | 245,681,886 | 0.417                  |
| 5  | rs4269805 <sup>c</sup>     | 245,682,093 | 0.063                  |
| 6  | rs6673459 <sup>a</sup>     | 245,682,135 | 0.071                  |
| 7  | rs6698597 <sup>a</sup>     | 245,682,218 | 0.045                  |
| 8  | rs4301663 <sup>c</sup>     | 245,682,292 | 0.136                  |
| 9  | rs10802505                 | 245,682,403 | 0.432                  |
| 10 | rs11802680 <sup>d</sup>    | 245,682,407 | 0.333                  |
| 11 | rs6665526 <sup>c</sup>     | 245,682,510 | 0.432                  |
| 12 | ss107635122 <sup>b,d</sup> | 245,682,563 | 0.024                  |
| 13 | rs10925031                 | 245,682,666 | 0.024                  |
| 14 | rs6674091                  | 245,682,723 | 0.024                  |
| 15 | rs12406394 <sup>c</sup>    | 245,682,804 | 0.026                  |
| 16 | rs4362022 <sup>d</sup>     | 245,682,942 | 0.043                  |
| 17 | rs4372298                  | 245,683,069 | 0.457                  |
| 18 | rs10925032 <sup>c</sup>    | 245,683,202 | 0.022                  |
| 19 | rs4333884                  | 245,683,346 | 0.457                  |
| 20 | rs4593864                  | 245,683,356 | 0.457                  |
| 21 | rs4518943                  | 245,683,389 | 0.457                  |
| 22 | rs4436424                  | 245,683,425 | 0.478                  |
| 23 | rs55903505 <sup>b</sup>    | 245,683,462 | 0.435                  |
| 24 | rs4353135 <sup>a</sup>     | 245,683,659 | 0.413                  |
| 25 | rs56310736 <sup>b</sup>    | 245,683,709 | 0.022                  |
| 26 | rs4266924 <sup>a</sup>     | 245,683,757 | 0.457                  |
| 27 | rs10802506                 | 245,683,999 | 0.478                  |
| 28 | rs6677999                  | 245,684,020 | 0.478                  |
| 29 | ss107635120 <sup>b,c</sup> | 245,684,132 | 0.022                  |
| 30 | ss107635124 <sup>b,d</sup> | 245,684,289 | 0.048                  |
| 31 | rs6669625                  | 245,684,356 | 0.022                  |
| 32 | rs10802507                 | 245,684,374 | 0.477                  |
| 33 | rs10802508                 | 245,684,378 | 0.477                  |
| 34 | ss107635146 <sup>b</sup>   | 245,684,452 | 0.021                  |
| 35 | rs12745508                 | 245,684,602 | 0.477                  |
| 36 | rs12135709 <sup>c</sup>    | 245,684,694 | 0.406                  |
| 37 | rs10925033                 | 245,684,862 | 0.438                  |
| 38 | rs10925034 <sup>d</sup>    | 245,684,892 | 0.042                  |
| 39 | rs10925035 <sup>d</sup>    | 245,684,900 | 0.438                  |
| 40 | ss107635126 <sup>b,d</sup> | 245,684,966 | 0.021                  |
| 41 | rs6672845                  | 245,685,068 | 0.5                    |
| 42 | rs10925036                 | 245,685,254 | 0.438                  |
| 43 | rs9700400                  | 245,685,366 | 0.438                  |



|    |                            |             |       |
|----|----------------------------|-------------|-------|
| 44 | ss107635128 <sup>b</sup>   | 245,685,521 | 0.438 |
| 45 | rs10925038                 | 245,685,641 | 0.479 |
| 46 | ss107635130 <sup>b,d</sup> | 245,685,647 | 0.042 |
| 47 | rs9988617                  | 245,685,669 | 0.479 |
| 48 | rs9988501                  | 245,685,739 | 0.479 |
| 49 | rs9287213                  | 245,685,750 | 0.042 |
| 50 | rs9988571                  | 245,685,778 | 0.479 |
| 51 | rs9988620 <sup>c</sup>     | 245,685,814 | 0.479 |
| 52 | ss107635132 <sup>b</sup>   | 245,685,884 | 0.438 |
| 53 | rs9988621                  | 245,685,903 | 0.479 |
| 54 | rs9988572                  | 245,685,933 | 0.042 |
| 55 | ss107635133 <sup>b</sup>   | 245,685,965 | 0.438 |
| 56 | ss107635136 <sup>b</sup>   | 245,686,061 | 0.438 |
| 57 | ss107635138 <sup>b</sup>   | 245,686,130 | 0.438 |
| 58 | ss107635140 <sup>b</sup>   | 245,686,136 | 0.438 |
| 59 | rs4925664                  | 245,686,610 | 0.043 |
| 60 | rs12756328 <sup>d</sup>    | 245,686,690 | 0.143 |
| 61 | rs4925666                  | 245,686,879 | 0.476 |
| 62 | rs55646866 <sup>b,c</sup>  | 245,687,008 | 0.457 |
| 63 | rs4925667                  | 245,687,277 | 0.5   |
| 64 | rs10732301                 | 245,687,457 | 0.043 |
| 65 | ss107635142 <sup>b</sup>   | 245,687,462 | 0.457 |
| 66 | rs6672995 <sup>c</sup>     | 245,687,656 | 0.479 |
| 67 | rs4925669                  | 245,687,946 | 0.479 |
| 68 | rs11267736                 | 245,688,318 | 0.475 |
| 69 | ss107635144 <sup>b,d</sup> | 245,688,775 | 0.295 |
| 70 | rs10732302                 | 245,688,851 | 0.479 |
| 71 | rs55775744 <sup>b</sup>    | 245,688,902 | 0.435 |
| 72 | rs10737807                 | 245,688,941 | 0.5   |
| 73 | rs34837390                 | 245,688,958 | 0.479 |
| 74 | rs10733113 <sup>a</sup>    | 245,688,980 | 0.479 |
| 75 | rs10925039 <sup>a</sup>    | 245,689,184 | 0.146 |
| 76 | rs10925040 <sup>d</sup>    | 245,689,321 | 0.417 |
| 77 | rs10925041                 | 245,689,331 | 0.417 |
| 78 | rs10754561 <sup>a</sup>    | 245,689,423 | 0.083 |
| 79 | rs4925671                  | 245,689,497 | 0.438 |

<sup>a</sup> SNPs ( $n=8$ ) observed in the sequencing experiment that had already been genotyped in the exploratory phase.

<sup>b</sup> Novel SNPs ( $n=18$ ) uncovered in the sequencing experiment as of dbSNP Build 126; 4 of these SNPs are now part of dbSNP Build 129.

<sup>c</sup> SNPs ( $n=13$ ) that were prioritized for the second phase of the genotyping experiments.

<sup>d</sup> SNPs ( $n=11$ ) observed in the sequencing experiment that were selected as tag for the second phase of the genotyping experiments using a pairwise tagging approach.

<sup>e</sup> The minor allele frequency (MAF) was estimated using the 24 samples sequenced for the 9kb region.

**Supplementary Table 4:** Association results between *NLRP3* gene expression levels and associated genotypes

| SNP ID      | Unstimulated Monocytes |                |         | Unstimulated Peripheral Blood Cells |                |         |
|-------------|------------------------|----------------|---------|-------------------------------------|----------------|---------|
|             | Slope                  | R <sup>2</sup> | P value | Slope                               | R <sup>2</sup> | P value |
| rs4353135   | 0.856 ± 0.321          | 0.1968         | 0.0124  | 0.677 ± 0.203                       | 0.2833         | 0.00246 |
| rs4266924   | 0.356 ± 0.578          | 0.01292        | 0.543   | 0.753 ± 0.450                       | 0.09112        | 0.105   |
| rs55646866  | 0.356 ± 0.578          | 0.01292        | 0.543   | 0.800 ± 0.442                       | 0.1080         | 0.0817  |
| rs6672995   | -0.011 ± 0.466         | 0.0000207      | 0.980   | 0.301 ± 0.357                       | 0.02577        | 0.405   |
| ss107635144 | -0.134 ± 0.491         | 0.002545       | 0.787   | 0.603 ± 0.415                       | 0.07025        | 0.157   |
| rs10733113  | -0.134 ± 0.491         | 0.002545       | 0.787   | 0.603 ± 0.415                       | 0.07025        | 0.157   |

**Supplementary Table 5:** Association results between IL-1β levels and associated genotypes

| SNP ID      | Unstimulated    |                |         | LPS 1.0 µg/ml |                |         |
|-------------|-----------------|----------------|---------|---------------|----------------|---------|
|             | Slope           | R <sup>2</sup> | P value | Slope         | R <sup>2</sup> | P value |
| rs4353135   | -0.0916 ± 0.102 | 0.02786        | 0.378   | -0.623 ± 2.85 | 0.001767       | 0.829   |
| rs4266924   | 0.0045 ± 0.166  | 0.0000260      | 0.979   | 4.44 ± 4.485  | 0.0350         | 0.331   |
| rs55646866  | 0.0568 ± 0.178  | 0.00363        | 0.752   | 6.51 ± 4.733  | 0.06554        | 0.180   |
| rs6672995   | 0.2610 ± 0.127  | 0.1346         | 0.0502  | 9.85 ± 3.285  | 0.2569         | 0.00591 |
| ss107635144 | 0.0784 ± 0.149  | 0.00971        | 0.604   | 4.62 ± 4.041  | 0.04618        | 0.263   |
| rs10733113  | 0.0784 ± 0.149  | 0.00971        | 0.604   | 4.62 ± 4.041  | 0.04618        | 0.263   |

**Supplementary Table 6:** Linkage disequilibrium between SNPs from Table 1 and SNPs genotyped in the *NLRP3* region in recently published genome-wide association studies (GWAS) for CD

|                   |            | <i>NLRP3</i> replicated SNPs <sup>a, b</sup> |           |           |            |
|-------------------|------------|----------------------------------------------|-----------|-----------|------------|
|                   |            | rs4353135                                    | rs4266924 | rs6672995 | rs10733113 |
| GWAS <sup>a</sup> | rs7529058  | 0.015                                        | 0.006     | 0         | 0.027      |
|                   | rs3738448  | 0.052                                        | 0.023     | 0.003     | 0.010      |
|                   | rs4612666  | 0.020                                        | 0.033     | 0         | 0.009      |
|                   | rs12143966 | 0.048                                        | 0.027     | 0.103     | 0.070      |
|                   | rs4925659  | 0.034                                        | 0.014     | 0.078     | 0.049      |
|                   | rs12065526 | 0.035                                        | 0.002     | 0.163     | 0.068      |

<sup>a</sup>  $r^2$  measure of linkage disequilibrium between the 4 replicated SNPs and SNPs present on the Affymetrix 500k and HumanHap300 arrays. SNPs are restricted to the region shown in **Fig.1** and that were not genotyped in the present study.

<sup>b</sup> rs55646866 and ss107635144 were excluded from this table because these 2 SNPs were uncovered as part of the resequencing effort in this project. There are thus no genotypes available from the HapMap project for these 2 SNPs.

**LEGEND SUPPLEMENTARY FIGURE 1:** *Association results between NLRP3 gene expression levels and associated genotypes.* Linear regression analysis of *NLRP3* mRNA level versus the genotypes of the six SNPs from **Table 1** (rs4353135, rs4266924, rs55646866, rs6672995, ss107635144, and rs10733113) in DNA-RNA matched freshly isolated peripheral blood cells (**a,c,e,g,i,k**; PBCs;  $n=30$ ) and monocytes (**b,d,f,h,j,l**;  $n=31$ ) obtained from healthy individuals. Genotypes of the six Crohn's disease (CD)-associated SNPs (**Table 1**) were obtained by sequencing. Mean threshold cycle ( $C_t$ ) was calculated for each sample from three replicates and then used to calculate relative expression levels ( $\Delta C_t$ ), which is the difference between *NLRP3*  $C_t$  and endogenous control 18S RNA  $C_t$ . Fold change in *NLRP3* expression was calculated using the ABI's comparative  $C_t$  method (see Methods), using as a reference the average  $\Delta C_t$  of the homozygous for the risk allele of each SNP.  $\Delta C_t$  (**a-l**) for each individual is shown in red; regression lines are shown as dashed lines (**a-l**).

**a**

**rs4353135, PBCs**

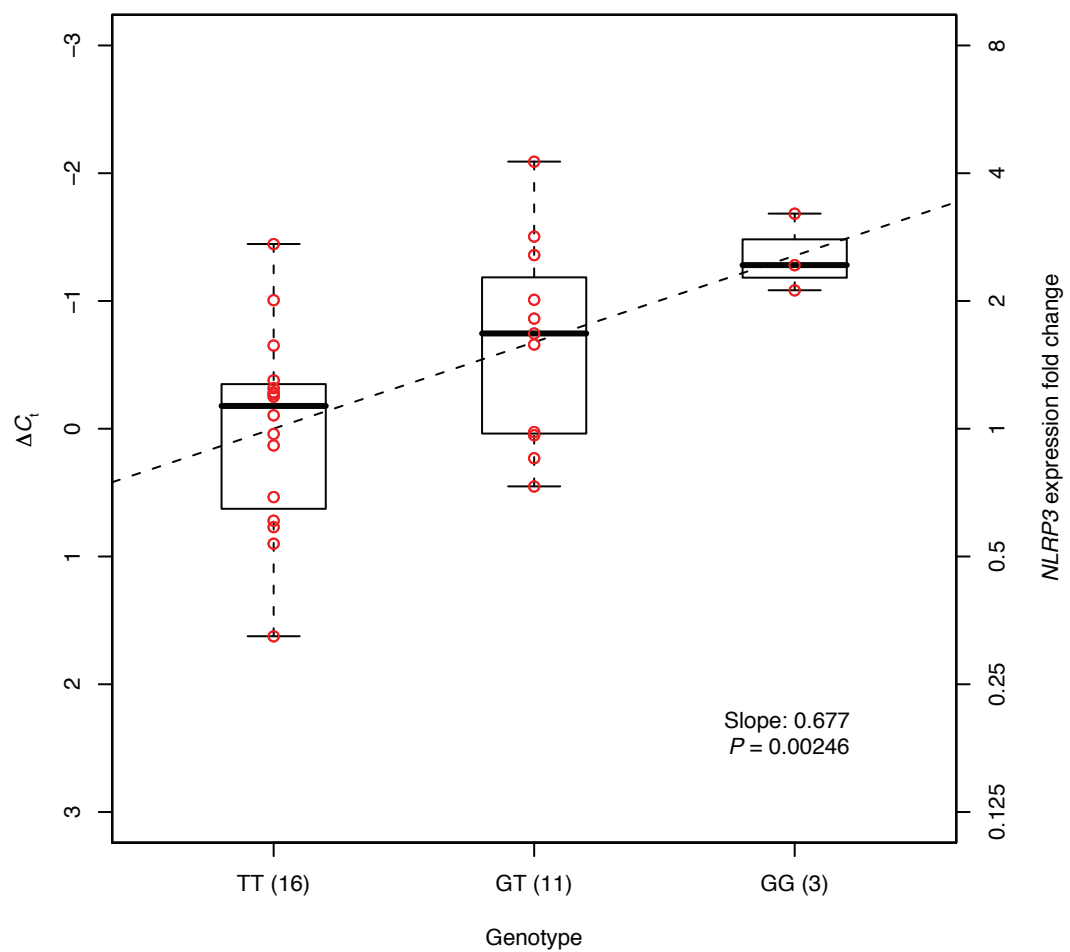

**b**

**rs4353135, monocytes**

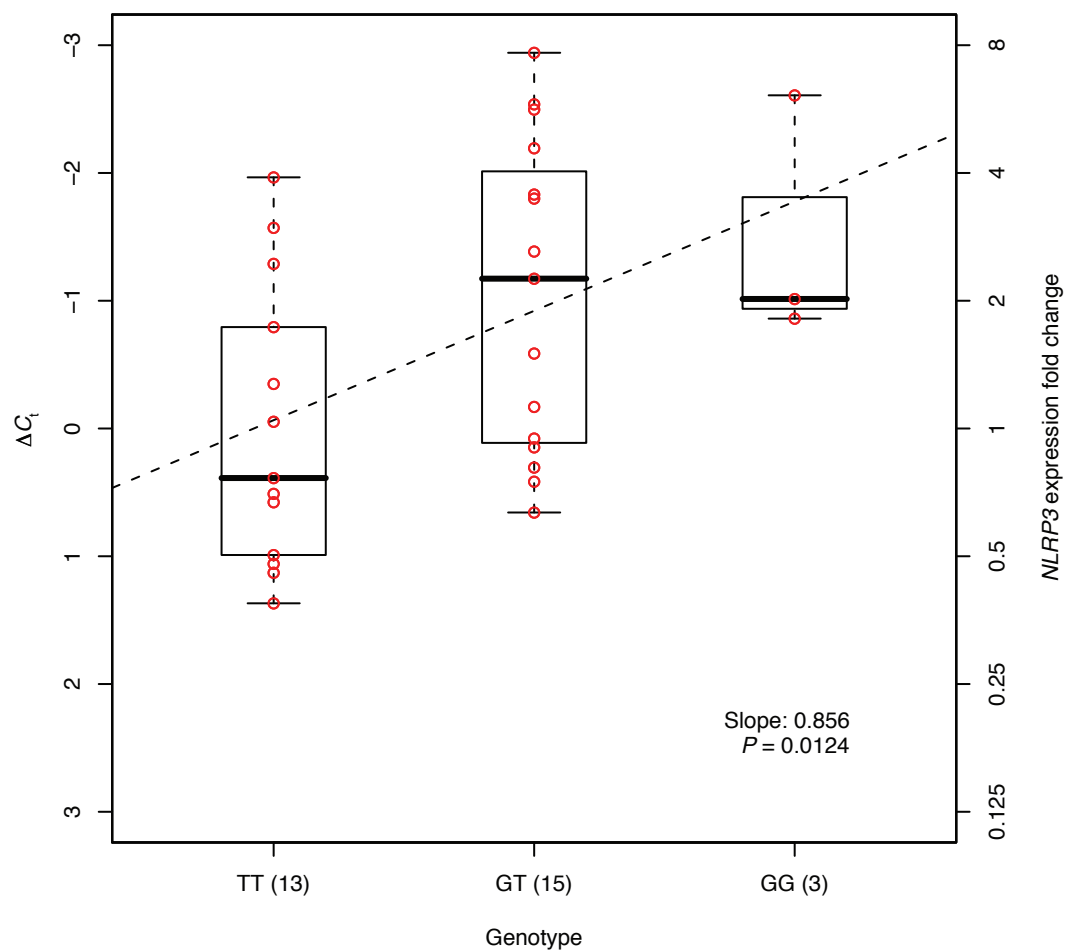

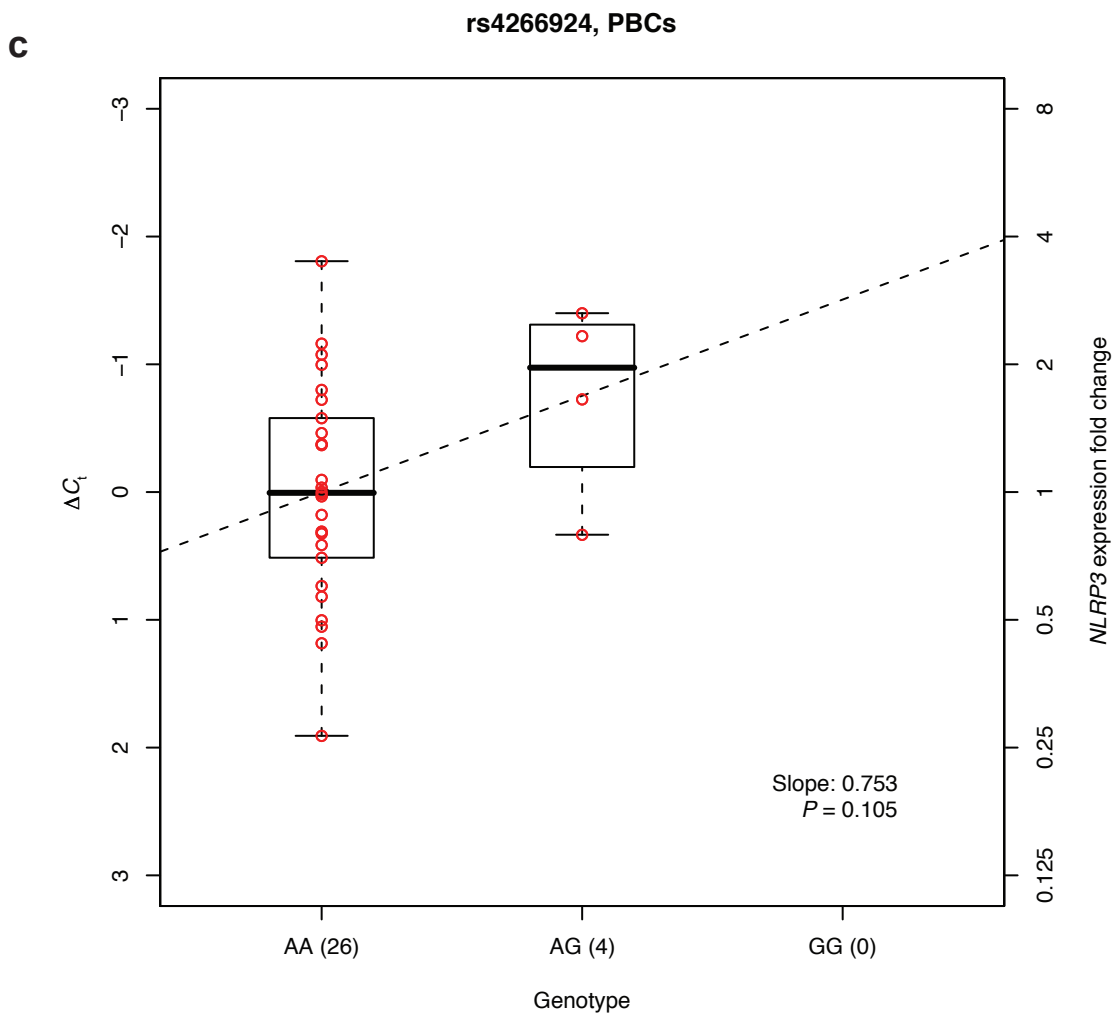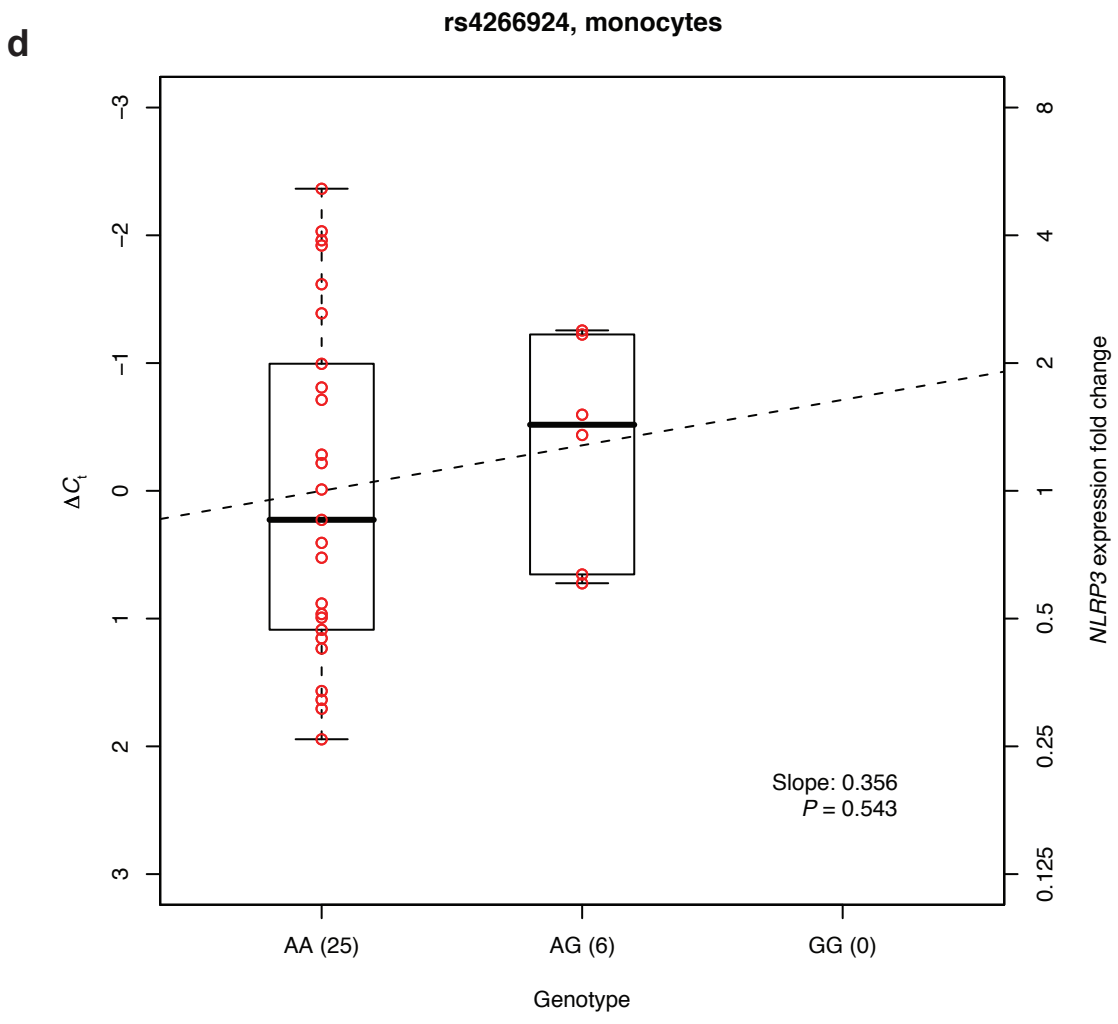

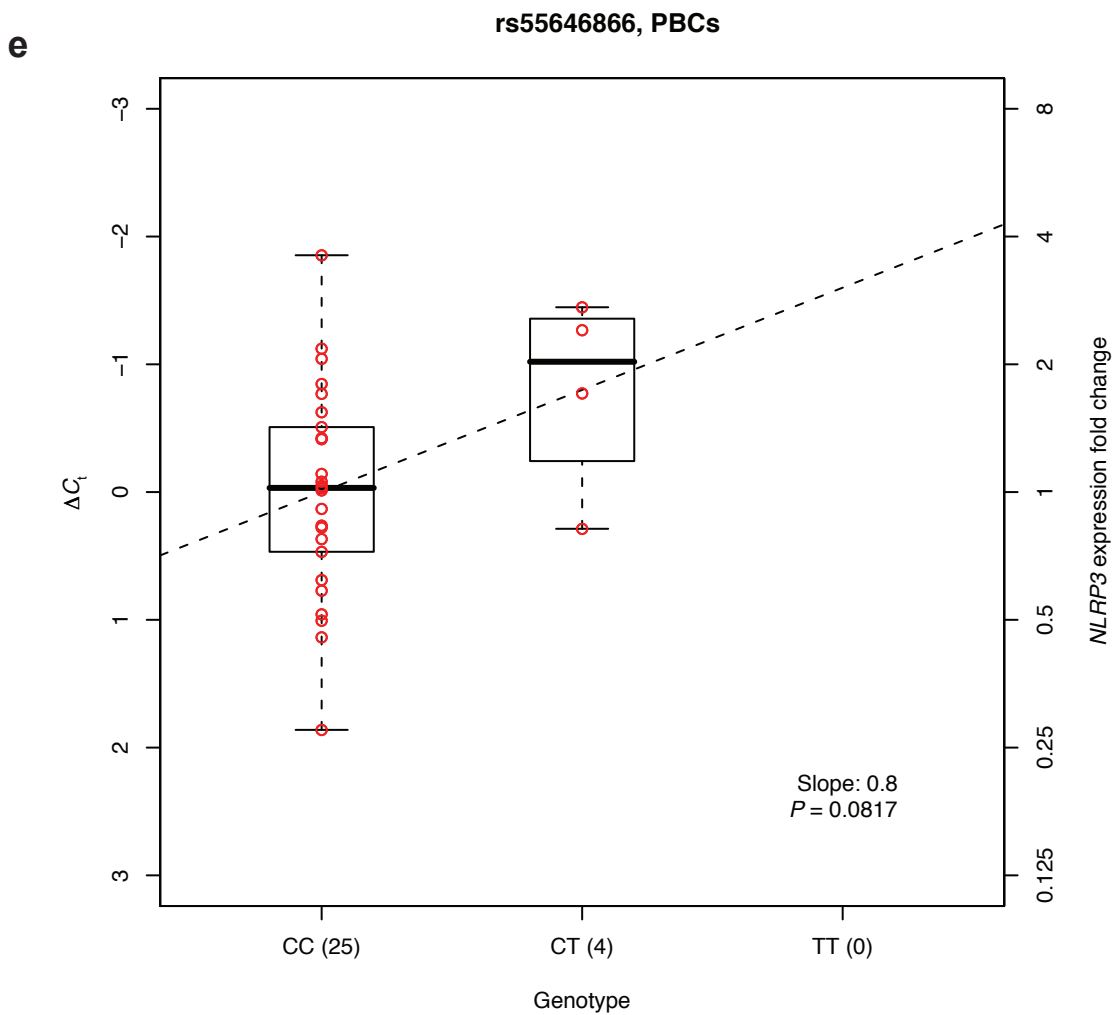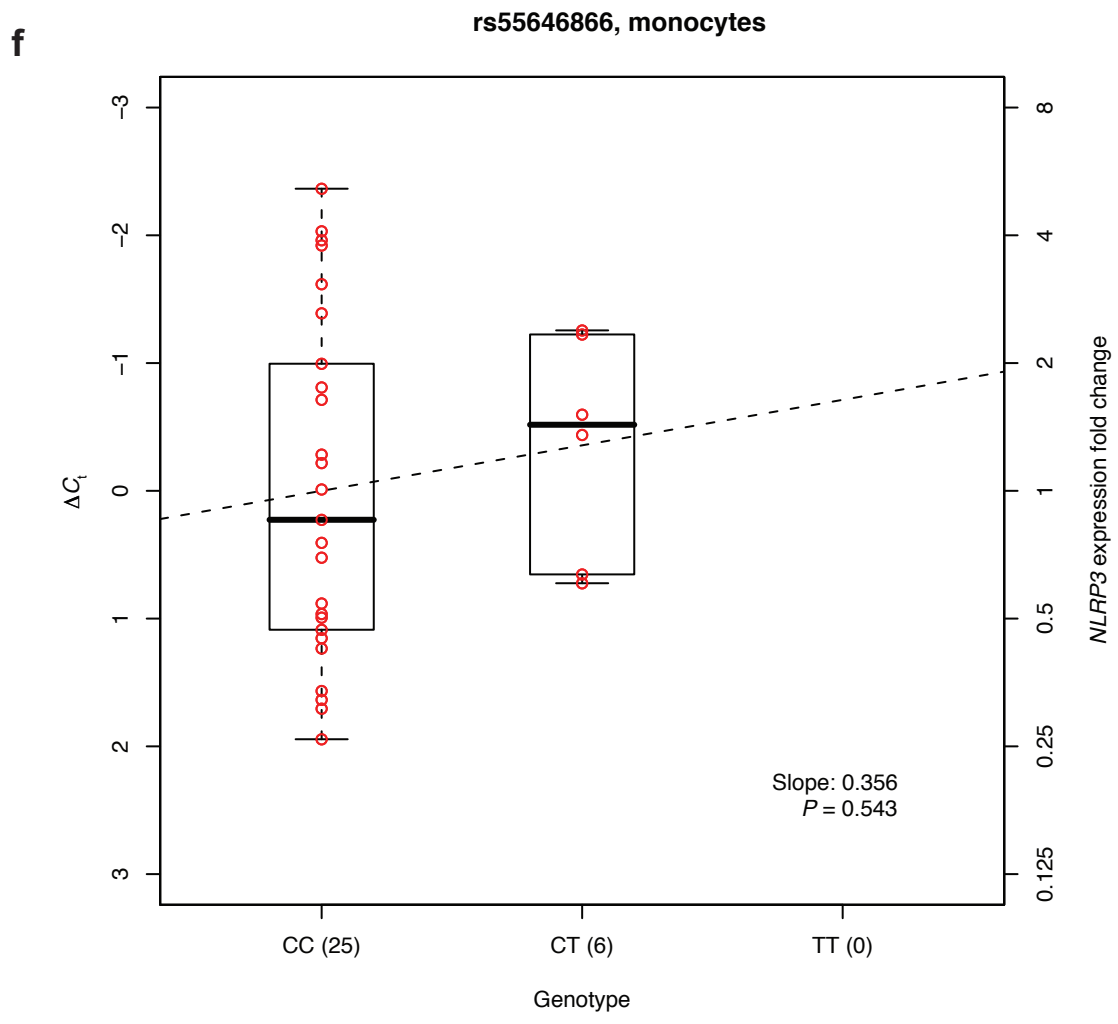

**g**

**rs6672995, PBCs**

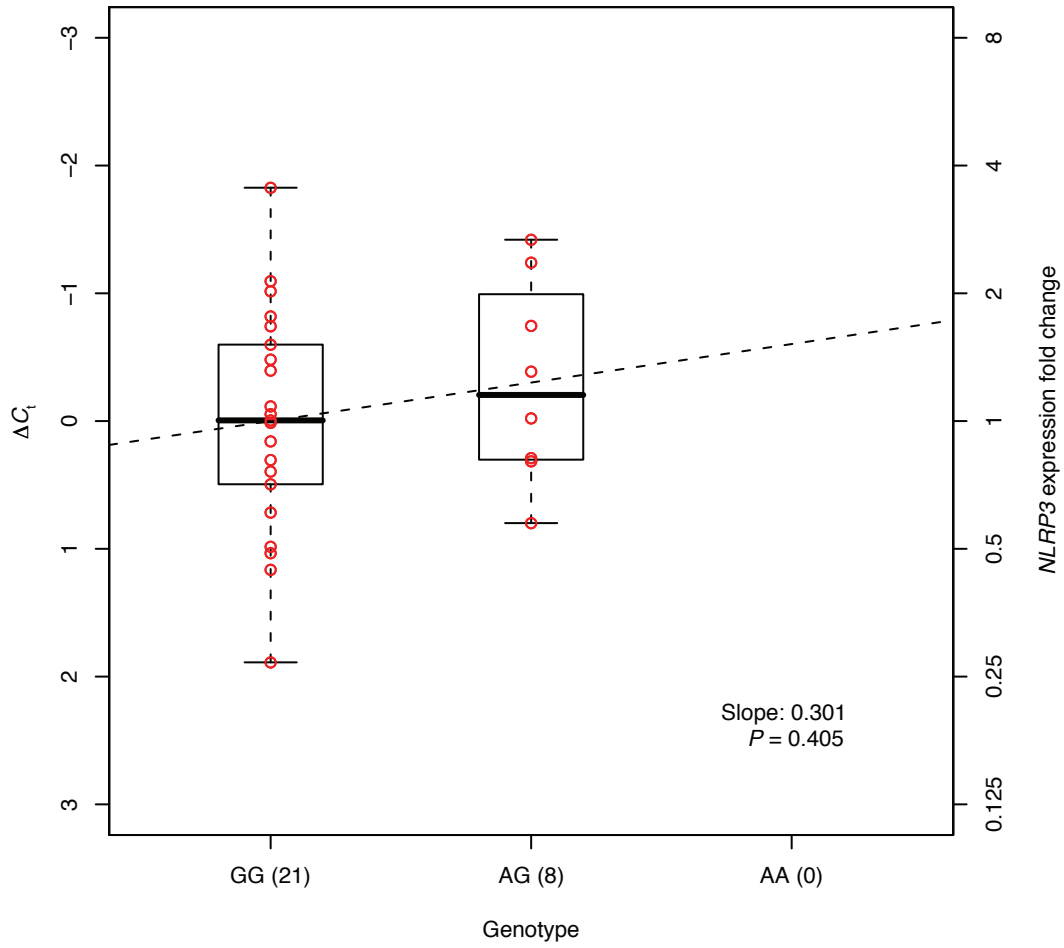

**h**

**rs6672995, monocytes**

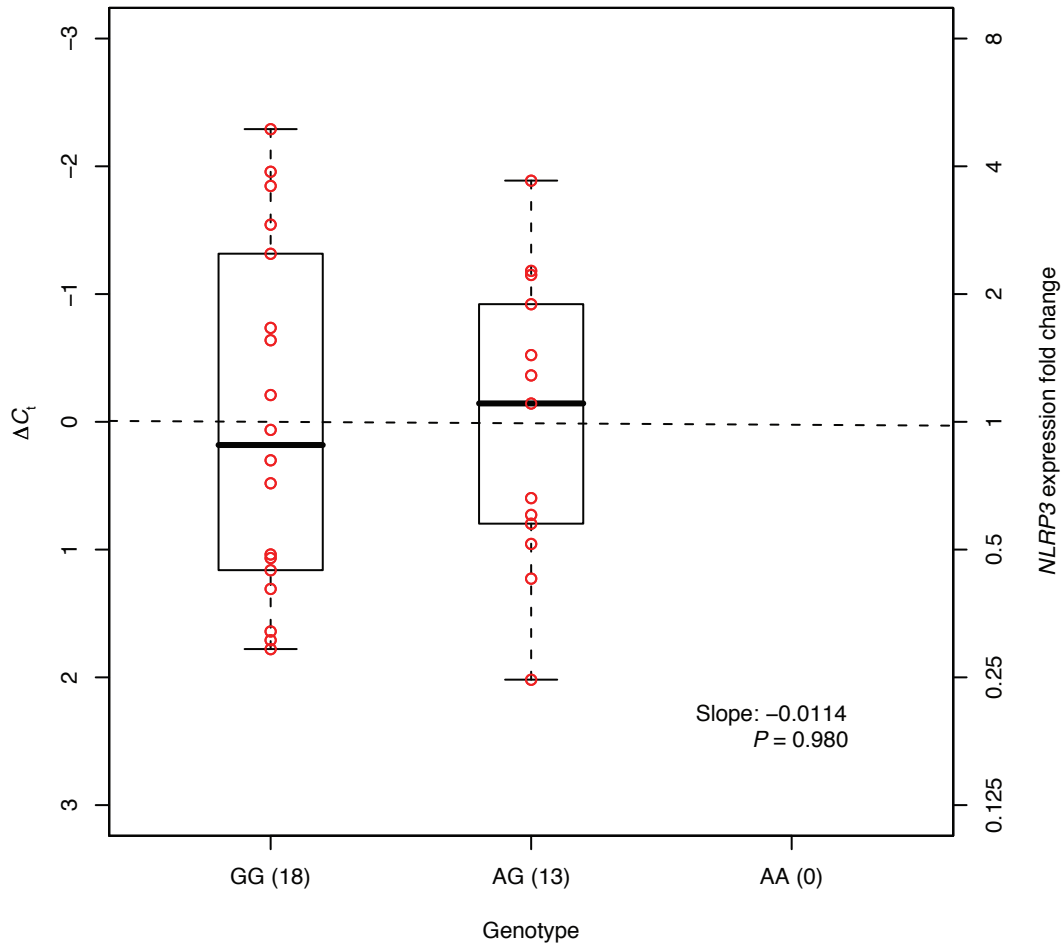



**i**

**ss107635144, PBCs**

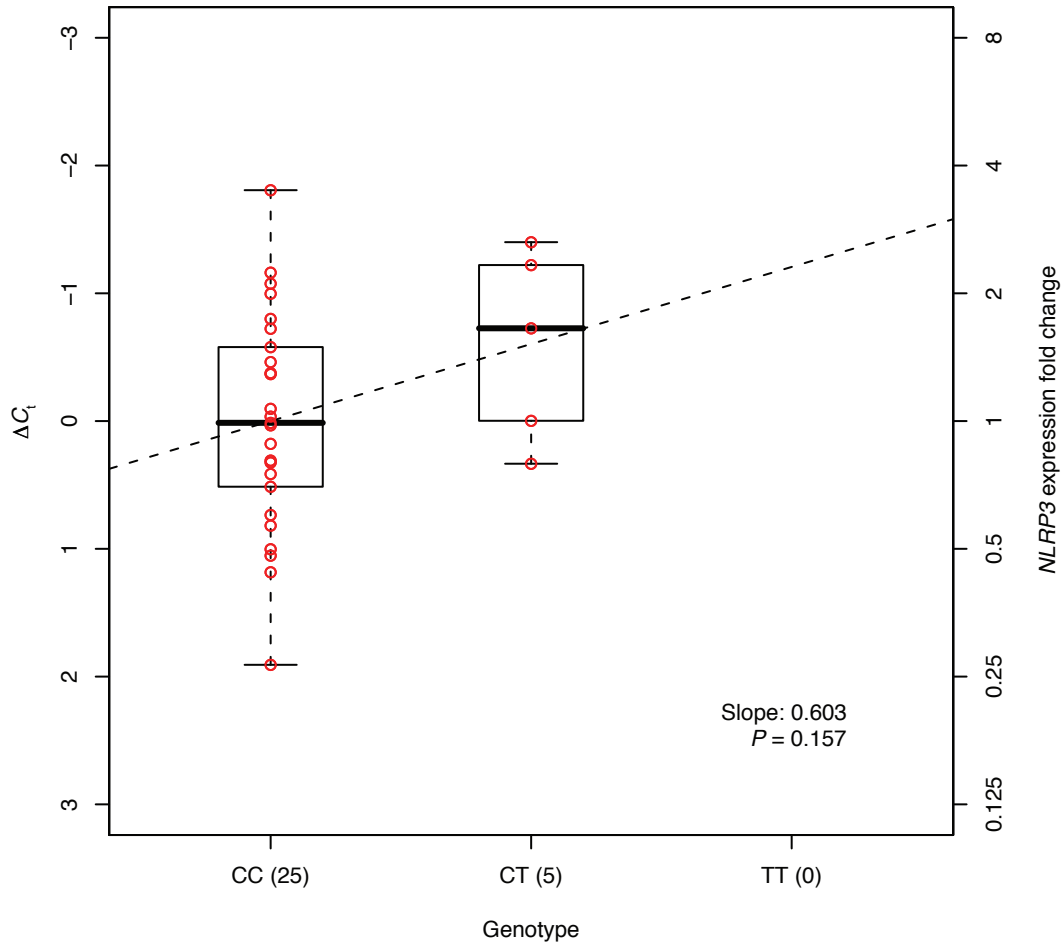

**j**

**ss107635144, monocytes**

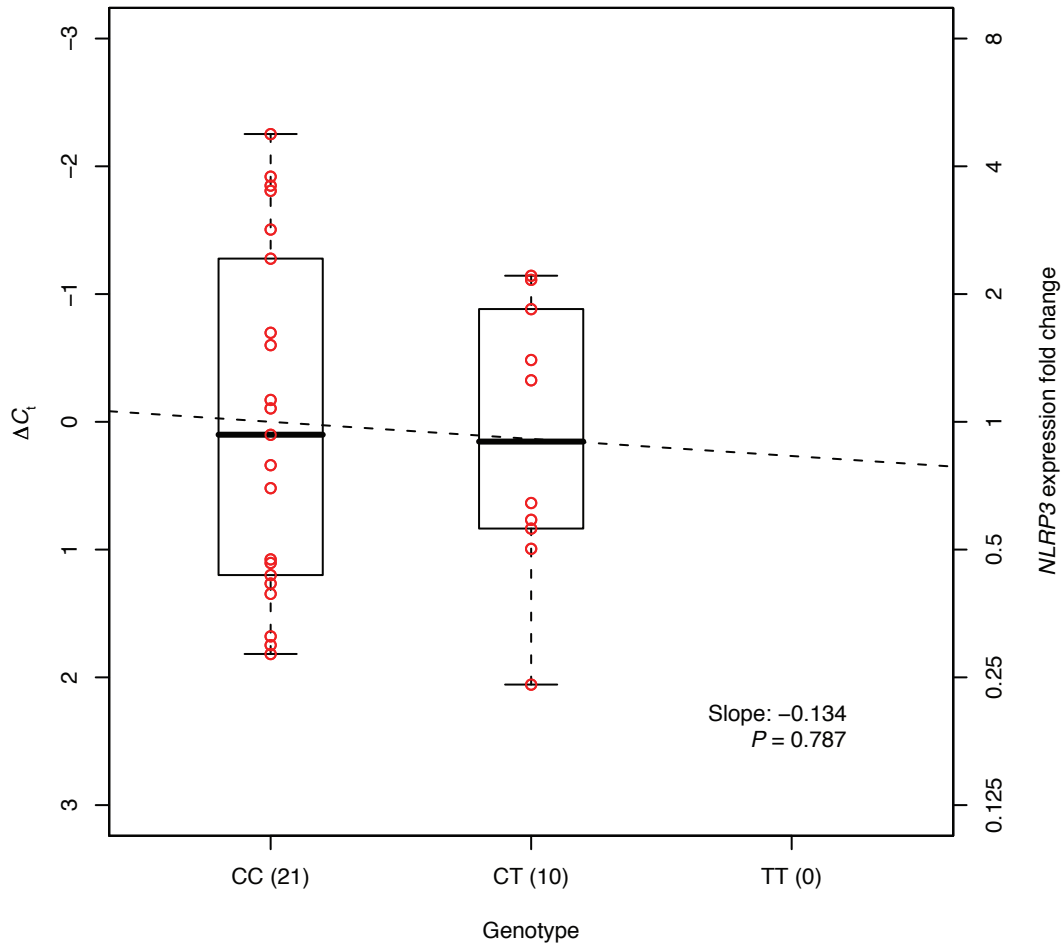

**k**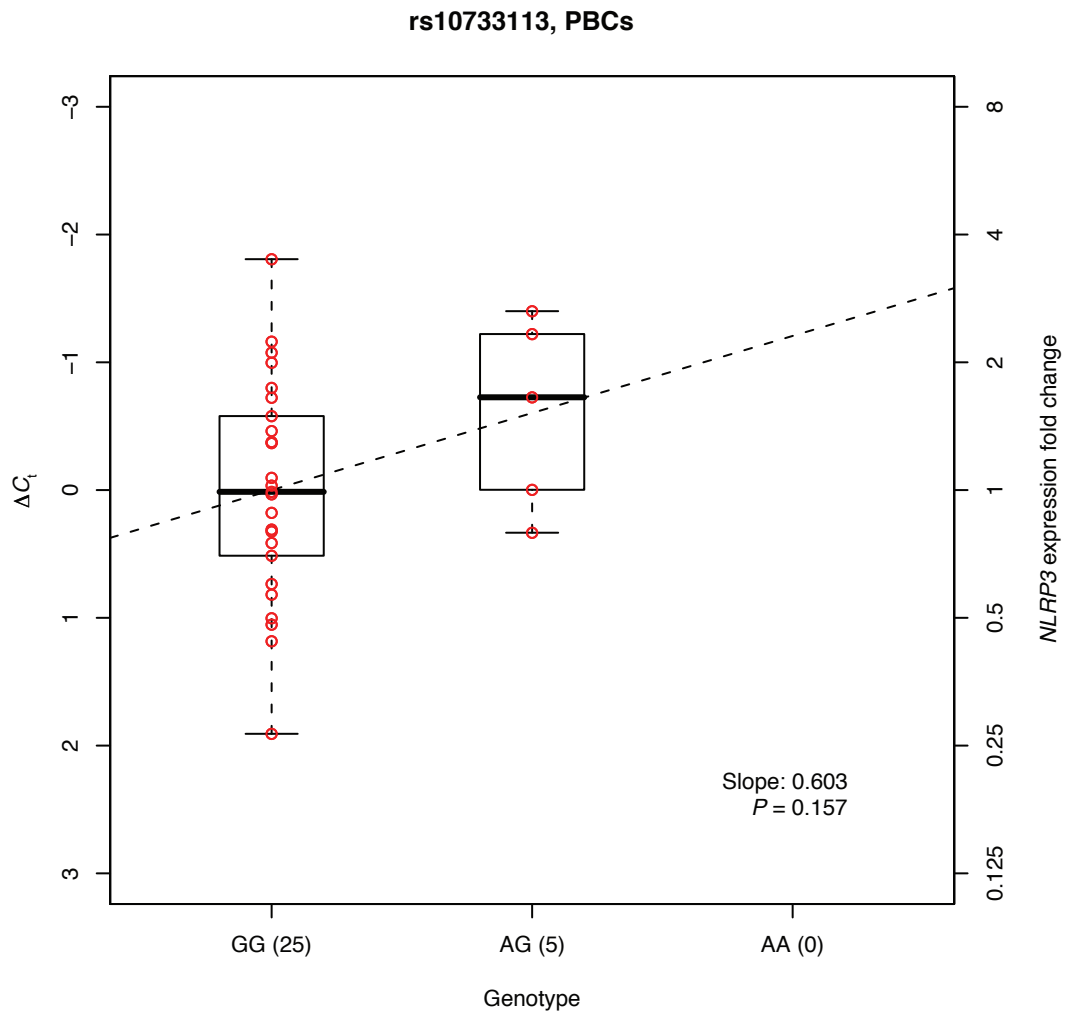**l**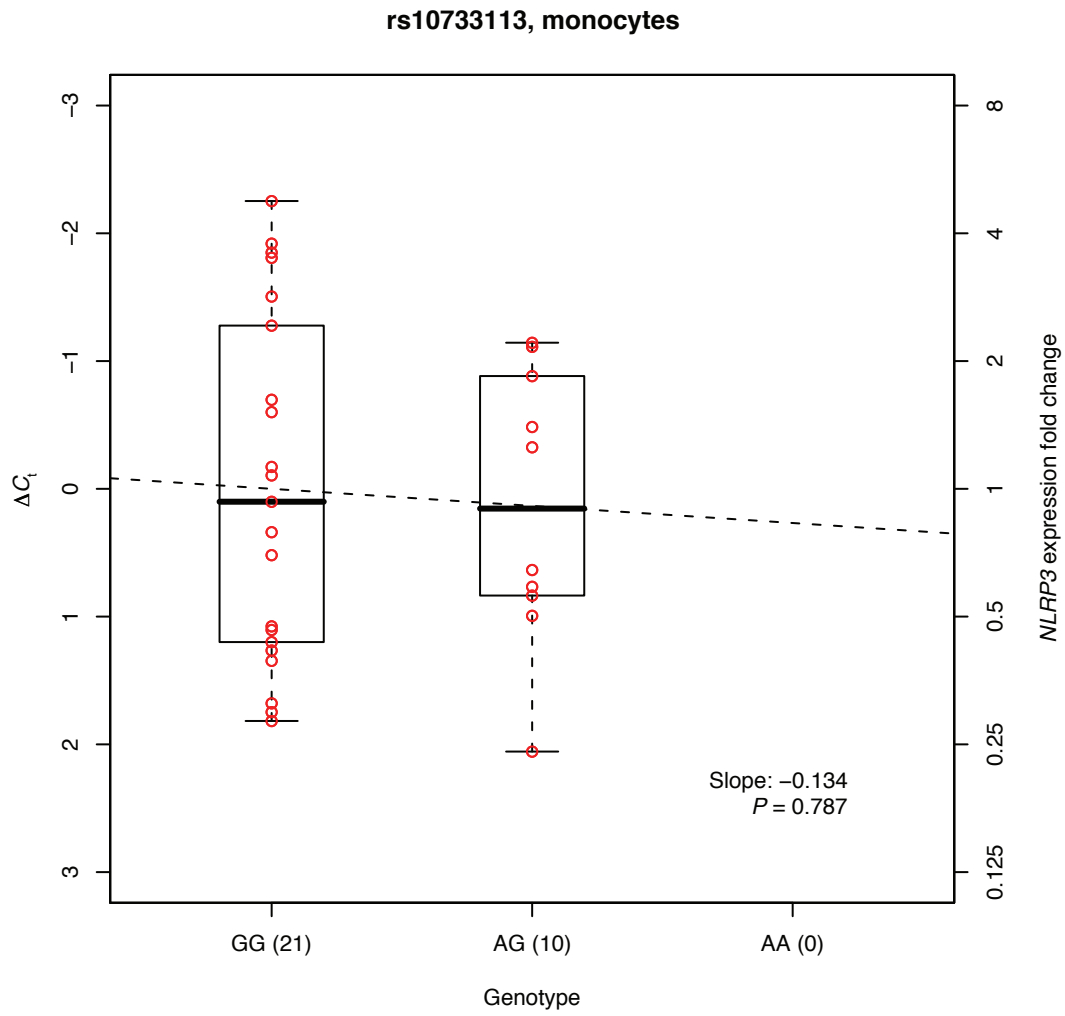

**LEGEND SUPPLEMENTARY FIGURE 2:** *Association results between IL-1 $\beta$  levels and associated genotypes.* Linear regression analysis of IL-1 $\beta$  production ( $\mu\text{g/ml}$ ) versus the genotypes of the six SNPs from **Table 1** (rs4353135, rs4266924, rs55646866, rs6672995, ss107635144, and rs10733113), obtained from sequencing, for unstimulated (**a,c,e,g,i,k**) and the LPS-stimulated (**b,d,f,h,j,l**; 1.0  $\mu\text{g/ml}$ ) conditions after 3 h of incubation. The IL-1 $\beta$  level (**a-l**) for each individual is shown in red; regression lines are shown as dashed lines (**a-l**).

**a**

rs4353135, unstimulated

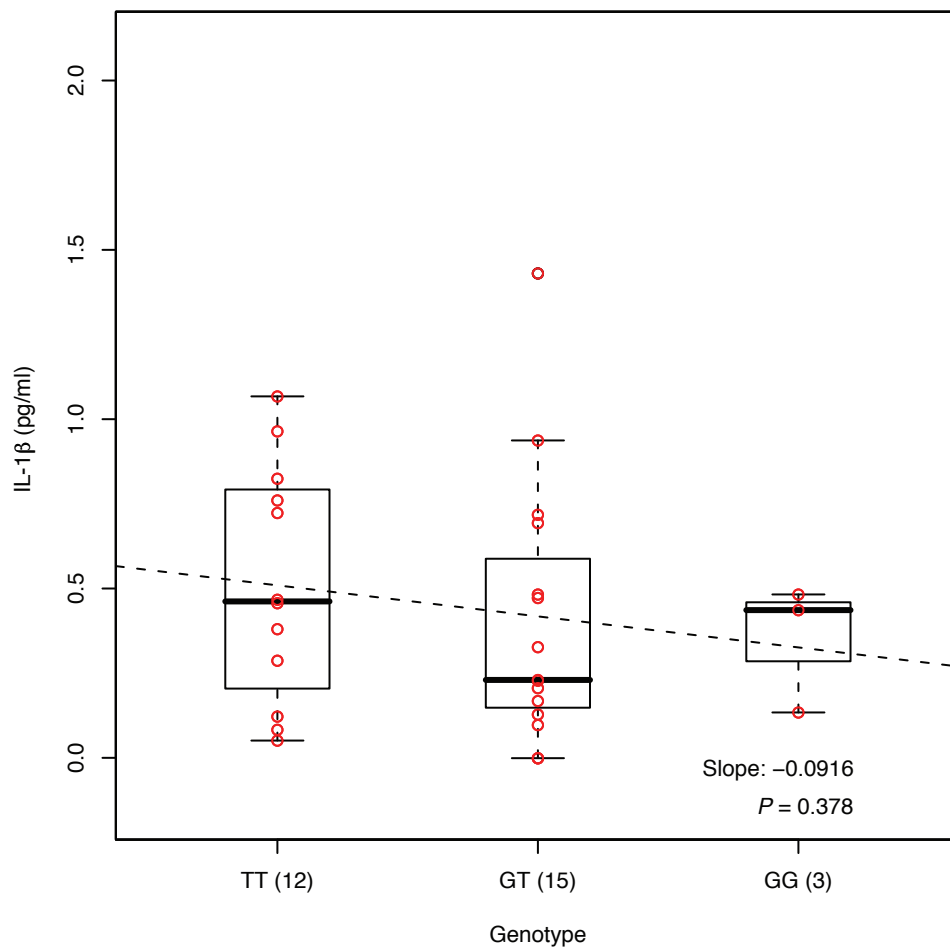

**b**

rs4353135, LPS

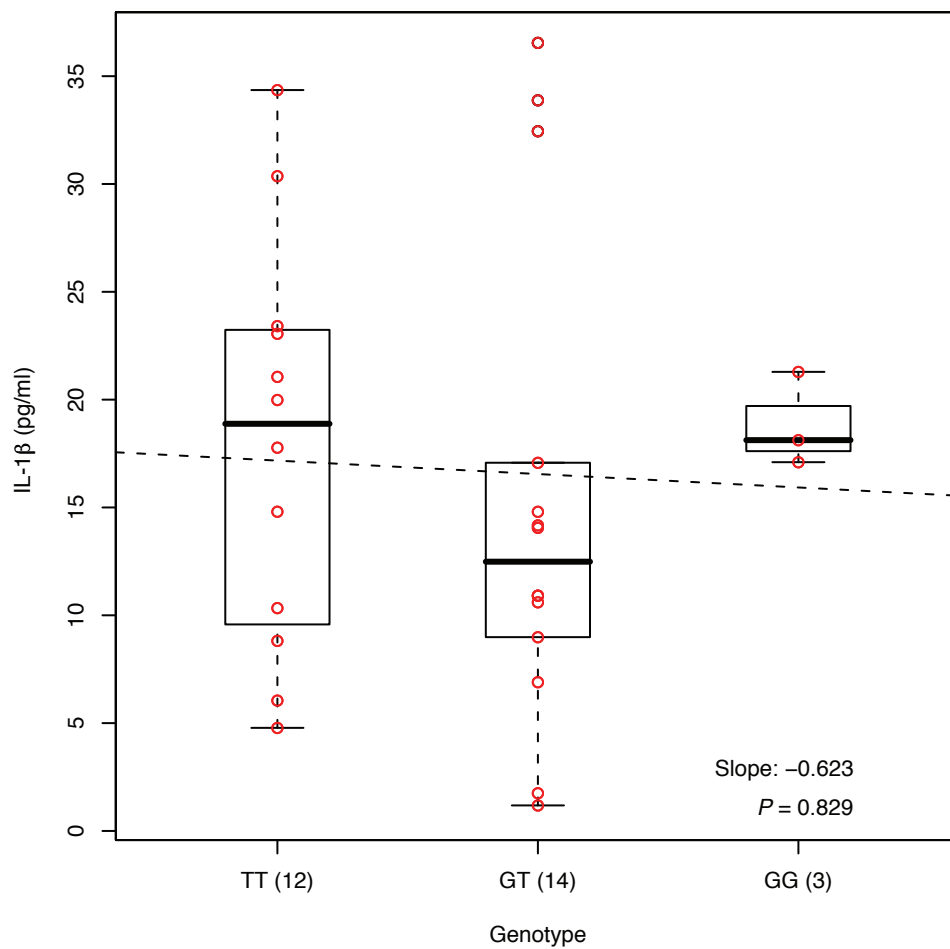

rs4266924, unstimulated

c

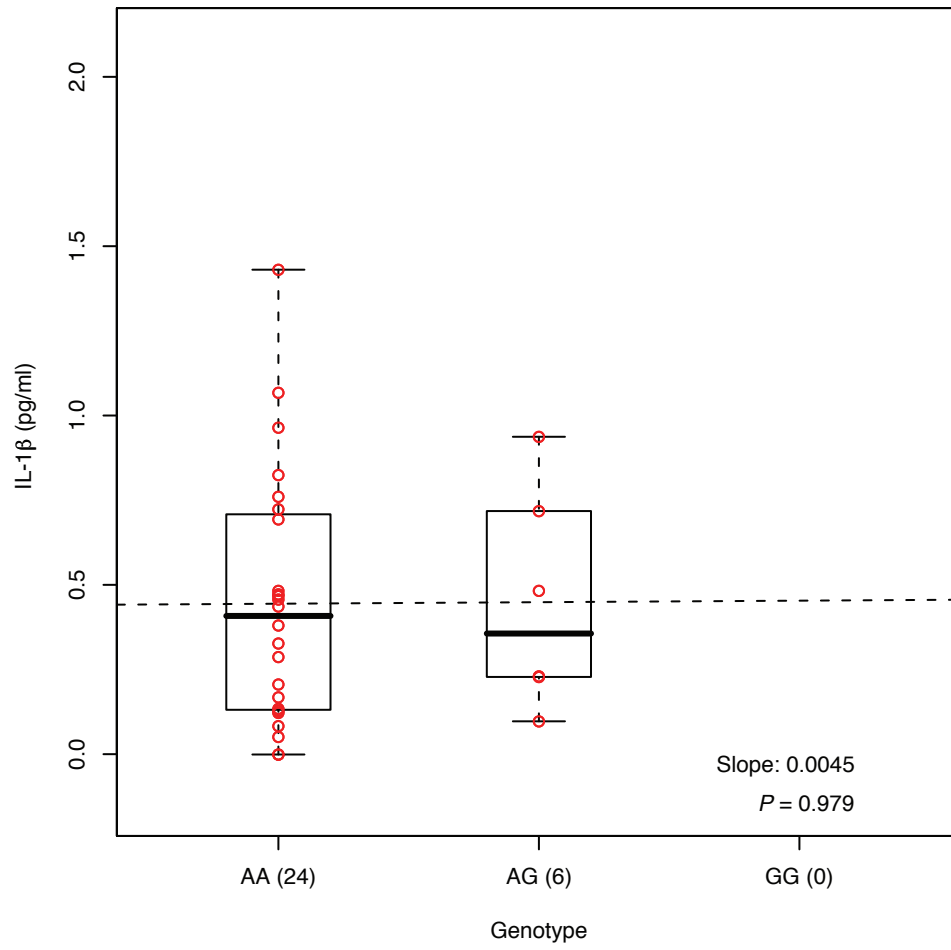

rs4266924, LPS

d

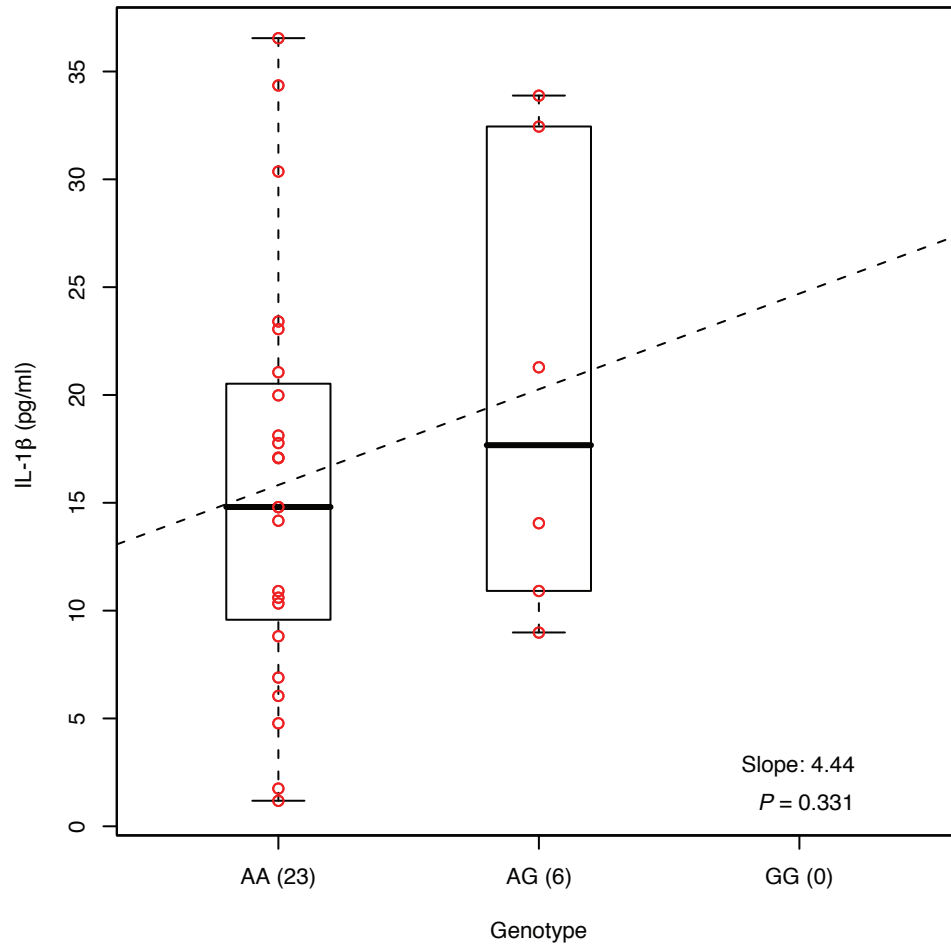

**e**

**rs55646866, unstimulated**

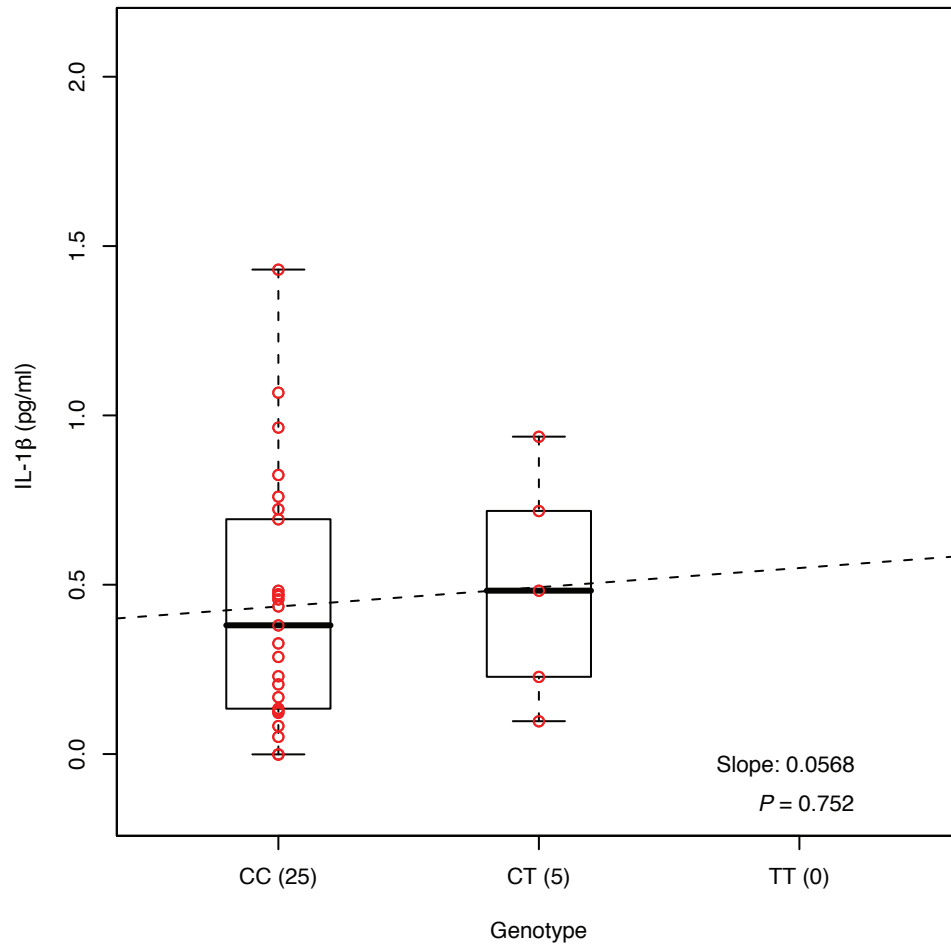

**f**

**rs55646866, LPS**

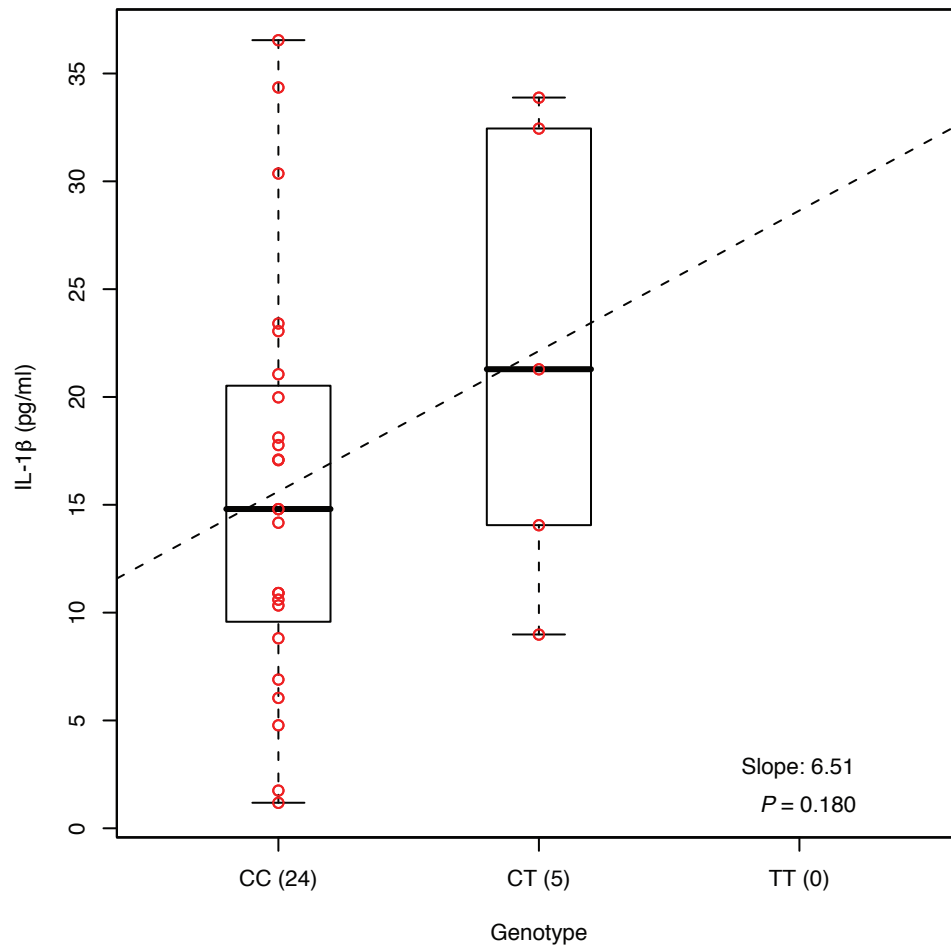

**g**

**rs6672995, unstimulated**

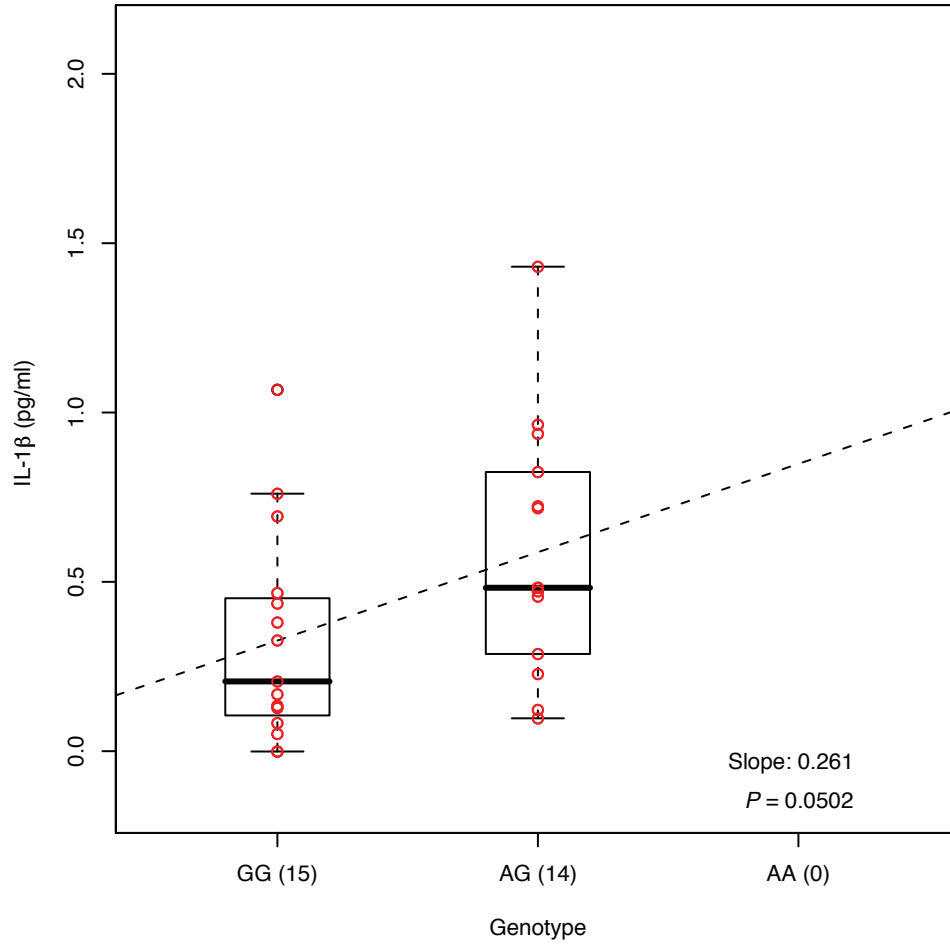

**h**

**rs6672995, LPS**

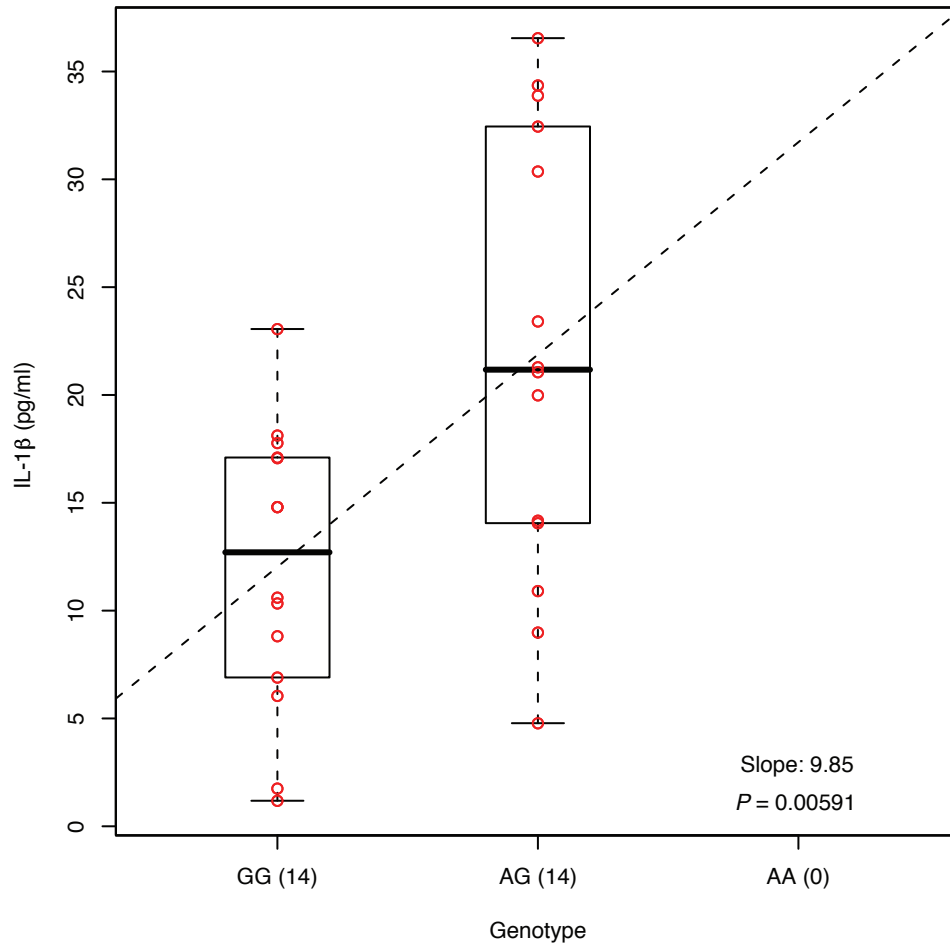

**i**

**ss107635144, unstimulated**

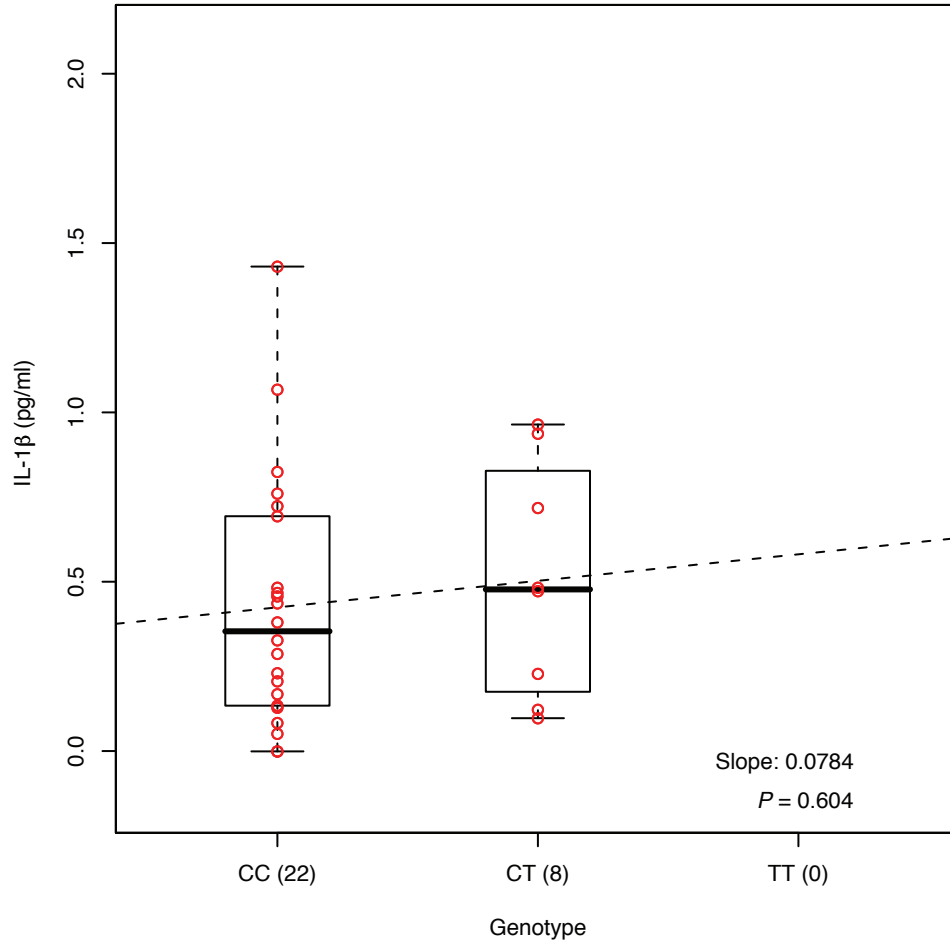

**j**

**ss107635144, LPS**

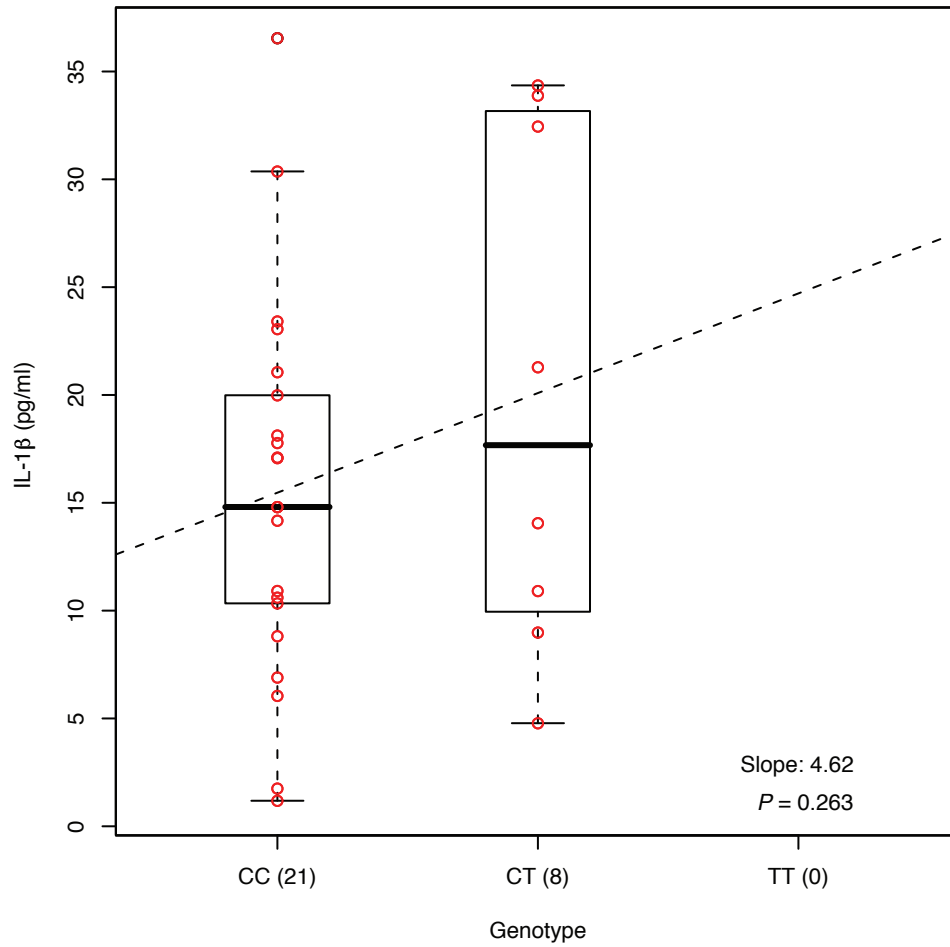



**k**

**rs10733113, unstimulated**

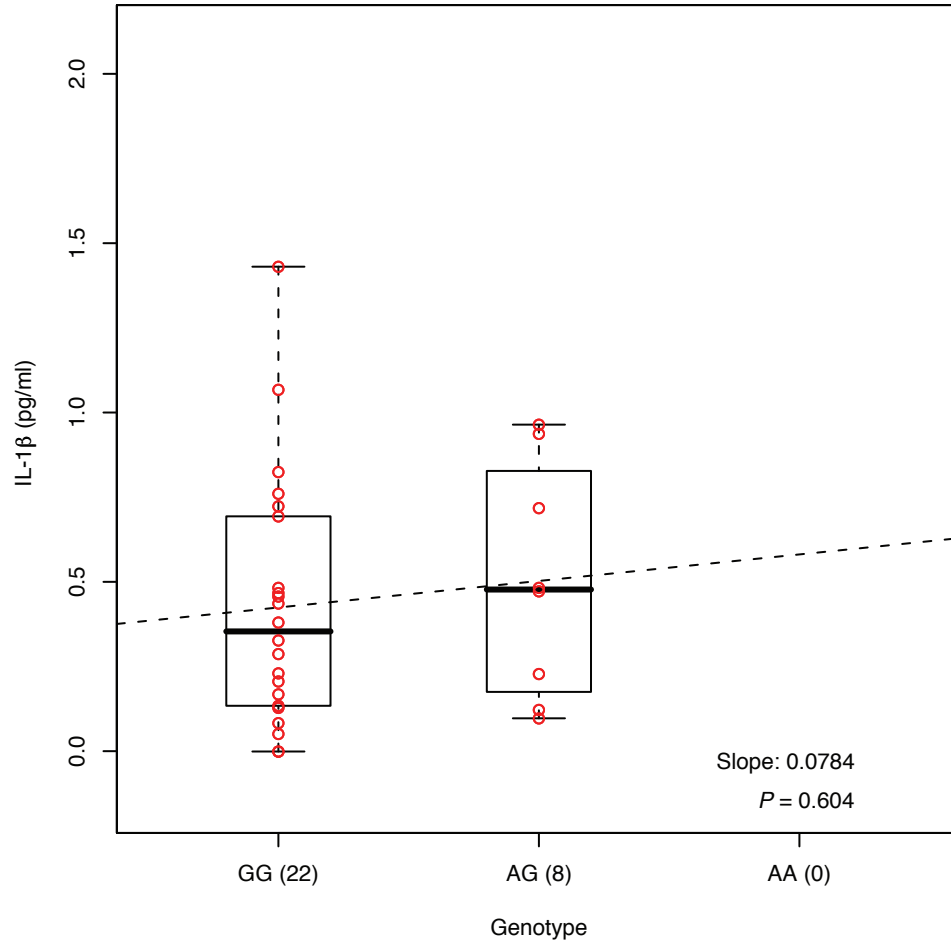

**l**

**rs10733113, LPS**

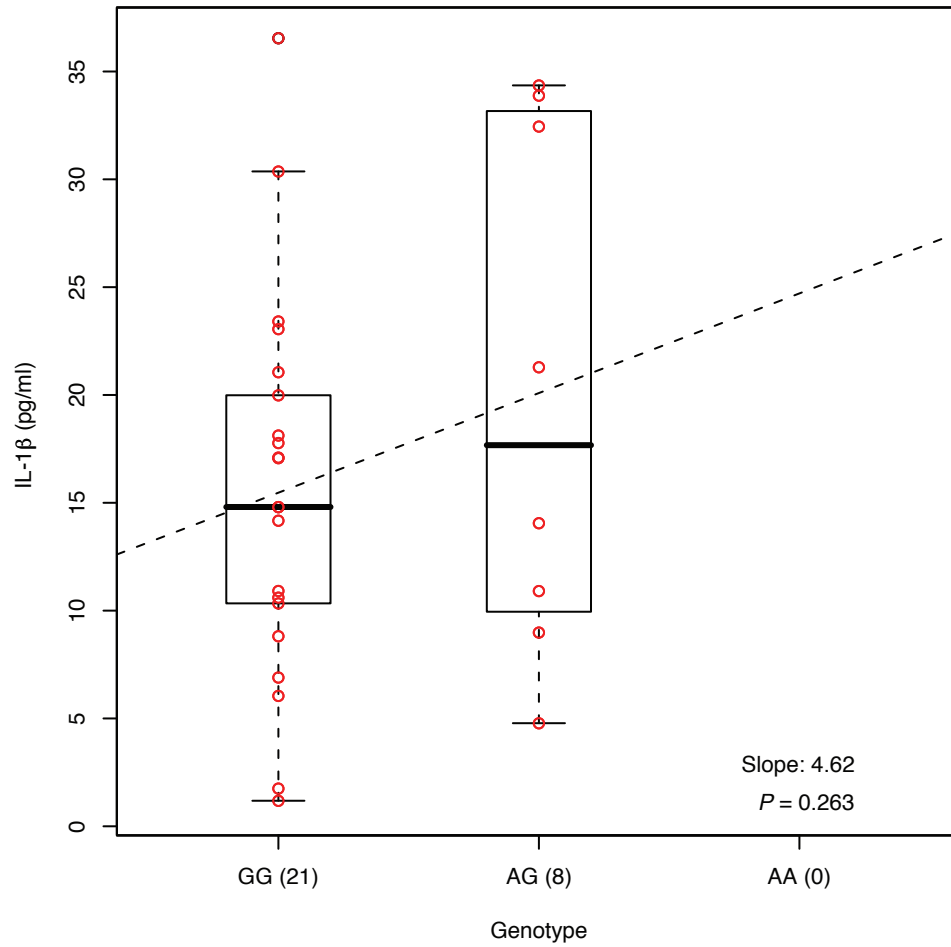

Supplement: NIHMS132892-supplement-Supplementary_Data.pdf [file NIHMS132892-supplement-Supplementary_Data.pdf]
